# Supplementary material for: Three-way interaction model to trace the mechanisms involved in Alzheimer’s disease transgenic mice
Source: PubMed Central journal article supplement (PMC5608283; doi:10.1371/journal.pone.0184697), 2017-09-21

**S1 Figs.** This file includes array images, MA plots, box plots and data histograms before and after of normalization

**Array images.** Two arrays (15.w.3 and 26.w.12) were removed from dataset, because the images of these arrays haven't an appropriate quality.

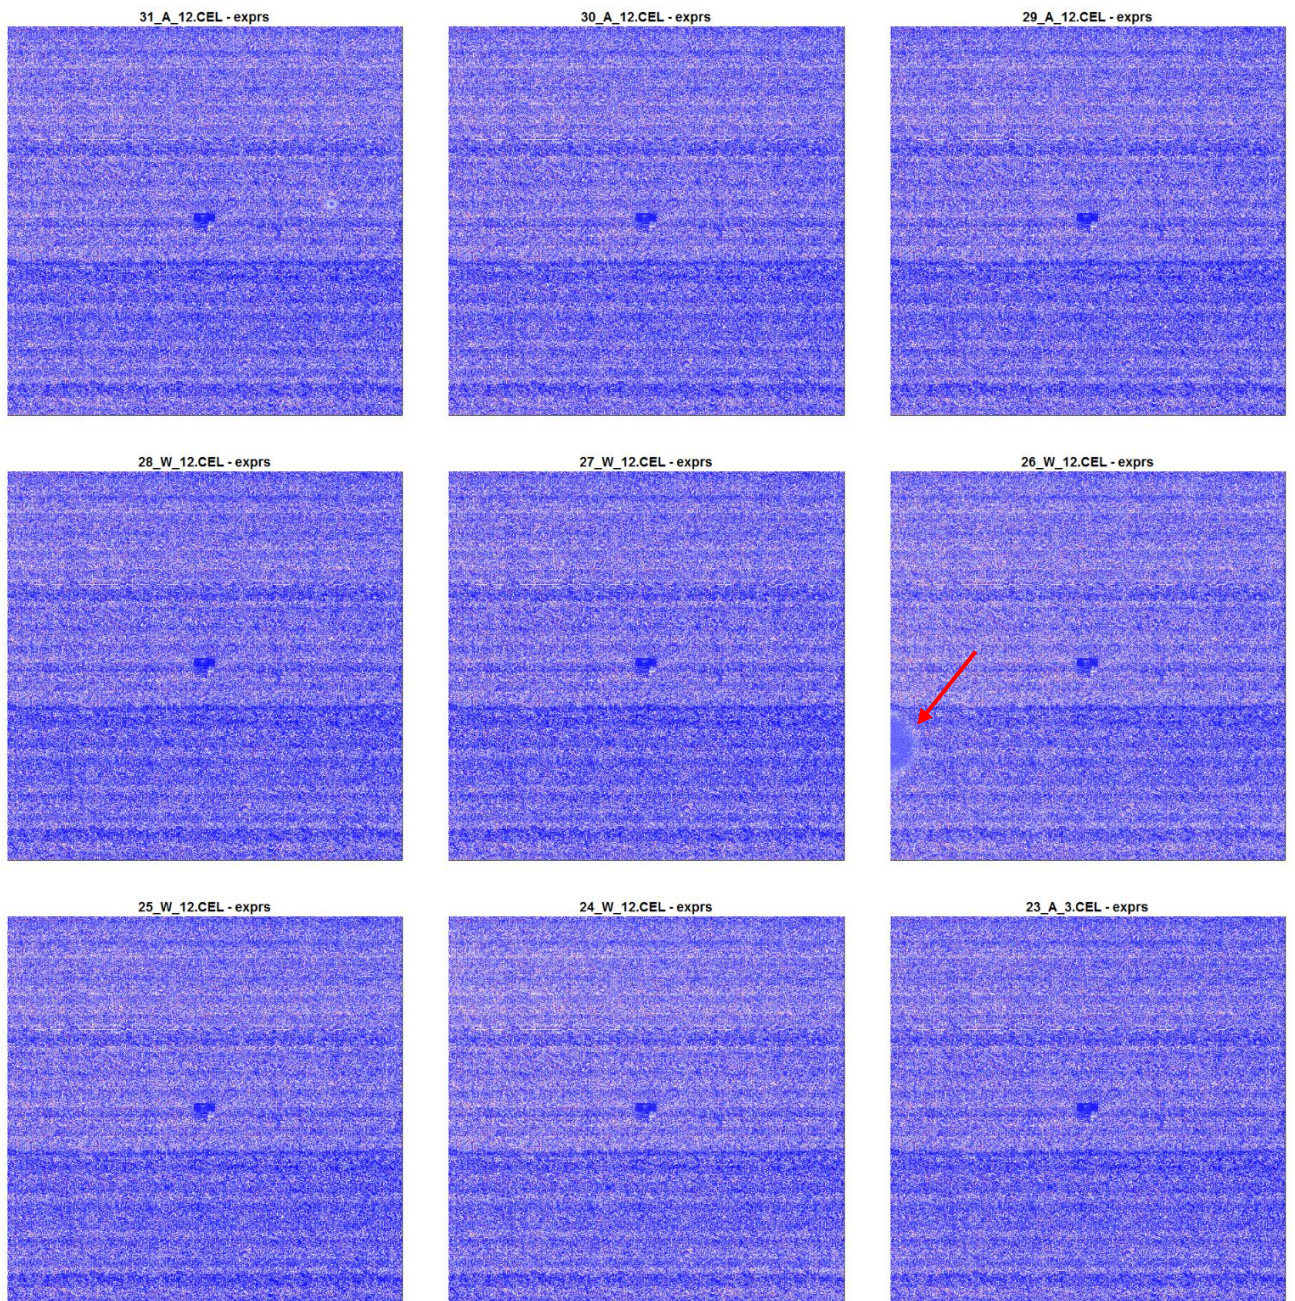

**S1 Figs.** This file includes array images, MA plots, box plots and data histograms before and after normalization

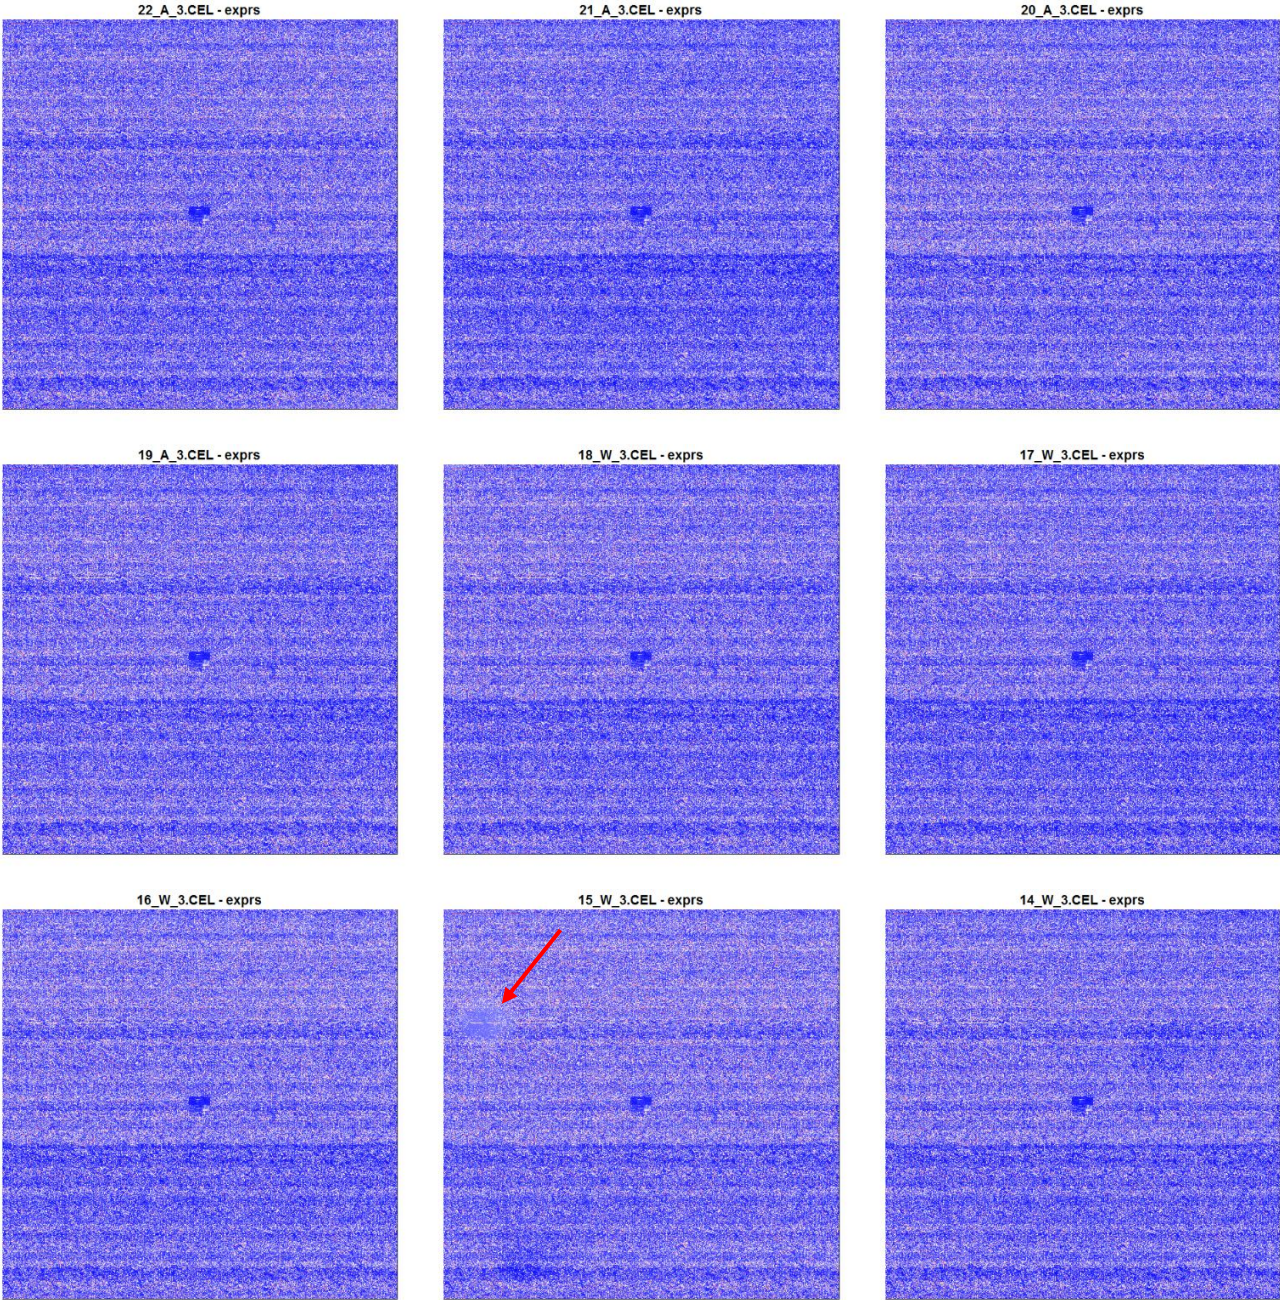

**S1 Figs.** This file includes array images, MA plots, box plots and data histograms before and after of normalization

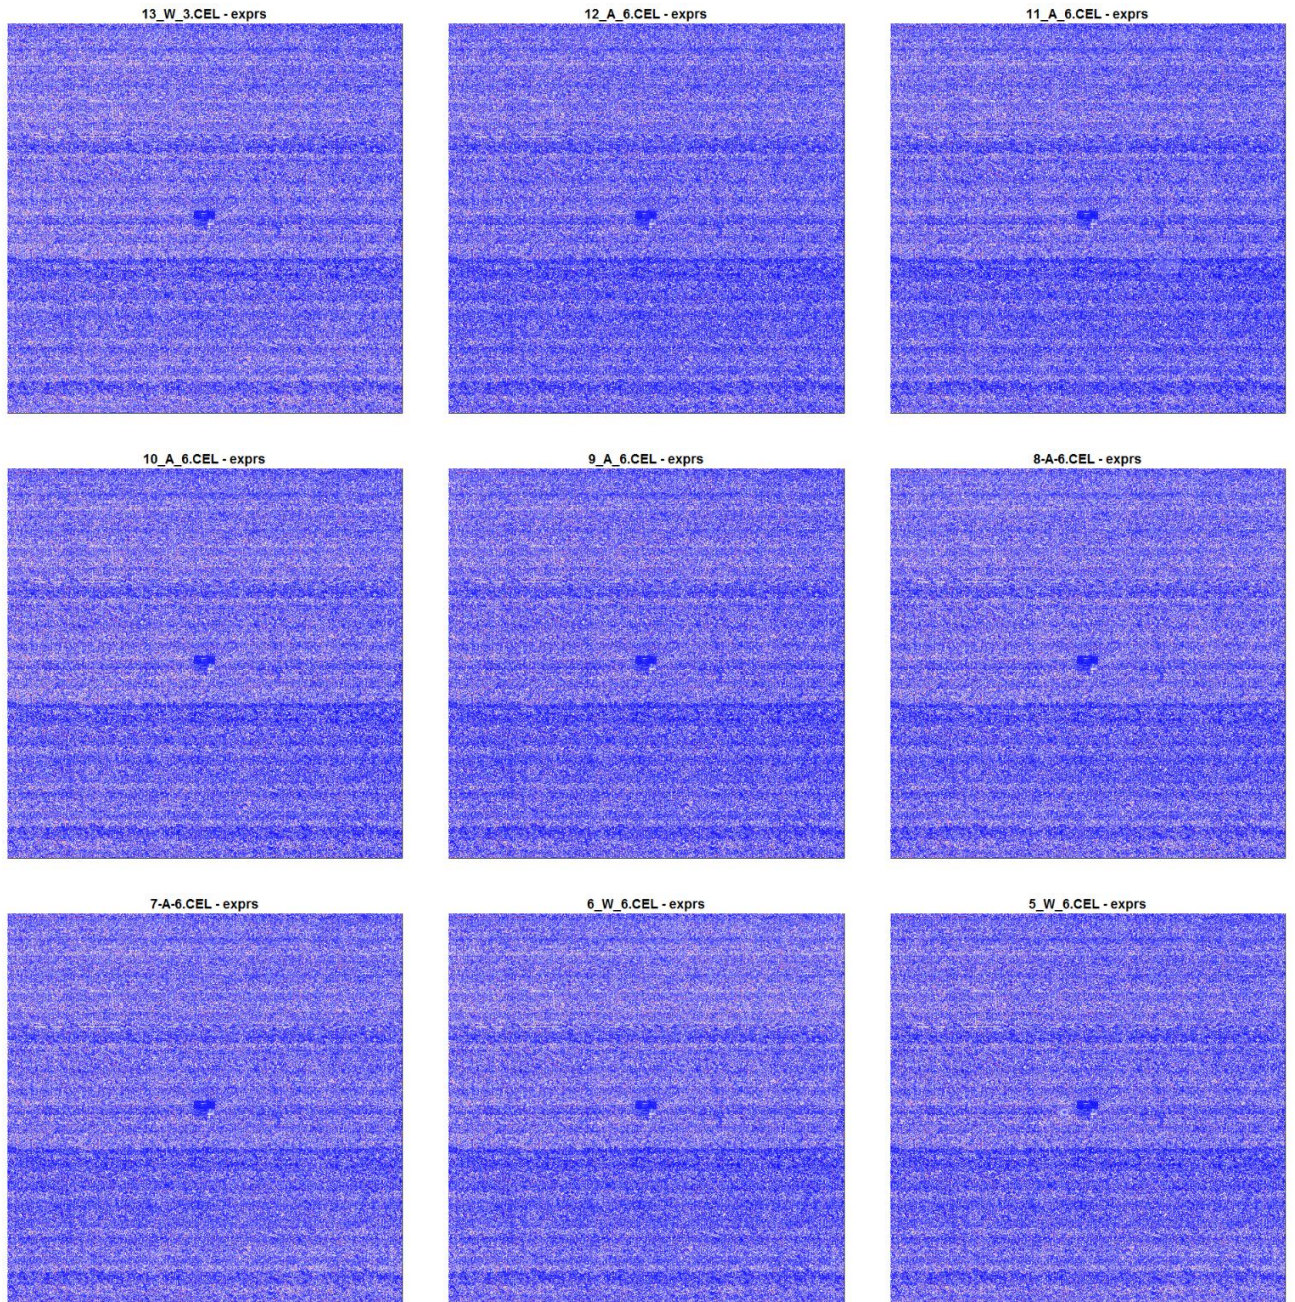

**S1 Figs.** This file includes array images, MA plots, box plots and data histograms before and after of normalization

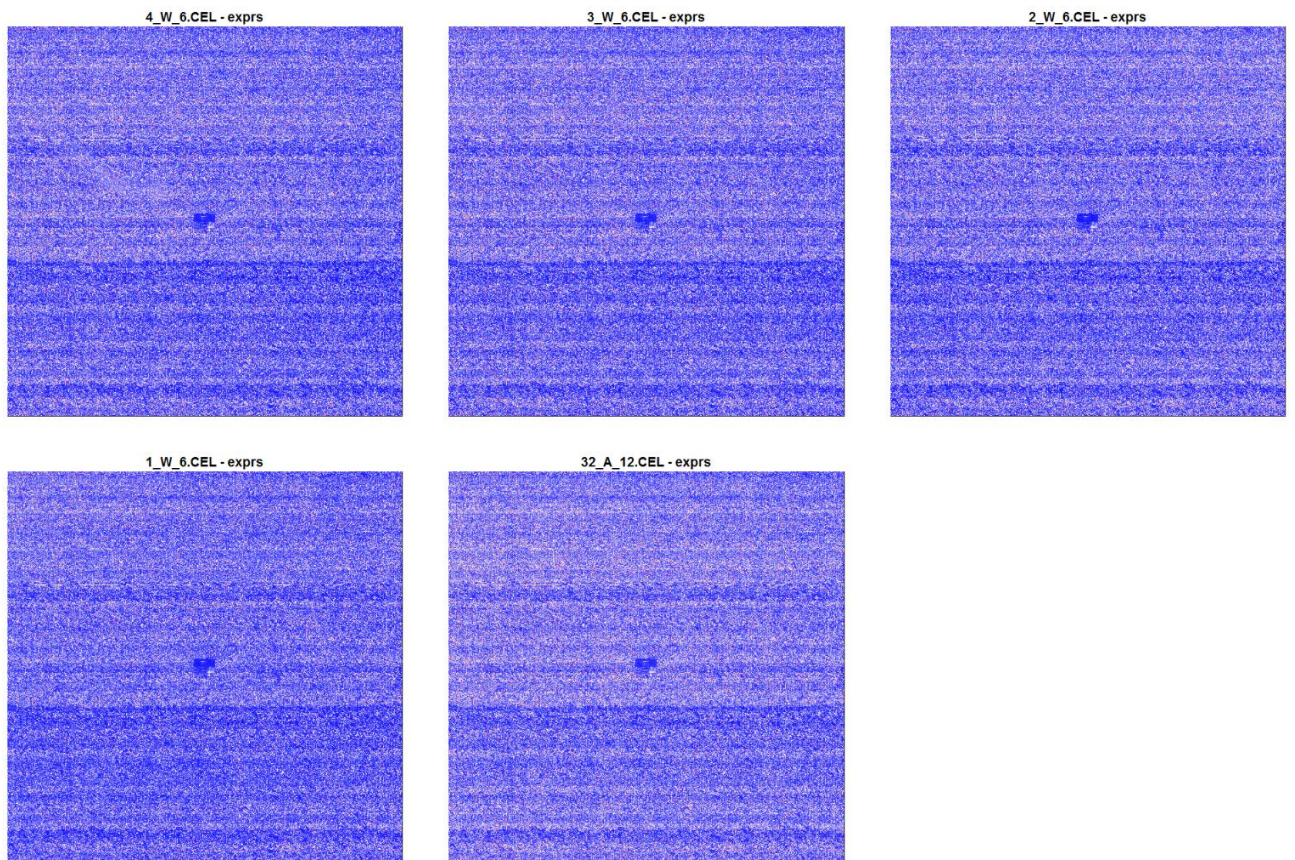

**S1 Figs.** This file includes array images, MA plots, box plots and data histograms before and after normalization

**MA plots.** MA plot of each array versus pseudo median reference chip.

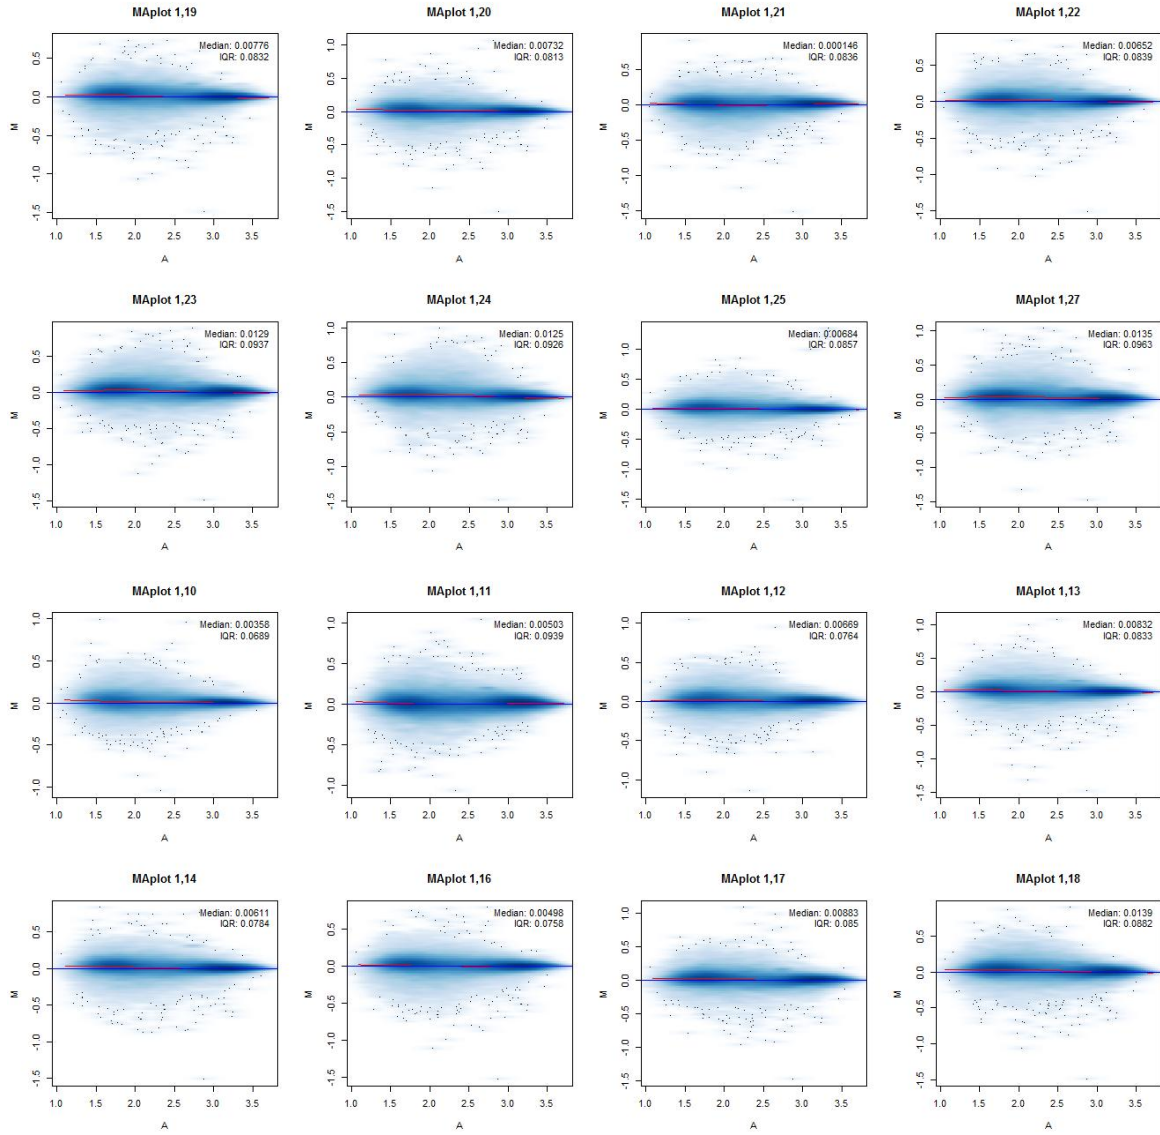

**S1 Figs.** This file includes array images, MA plots, box plots and data histograms before and after normalization

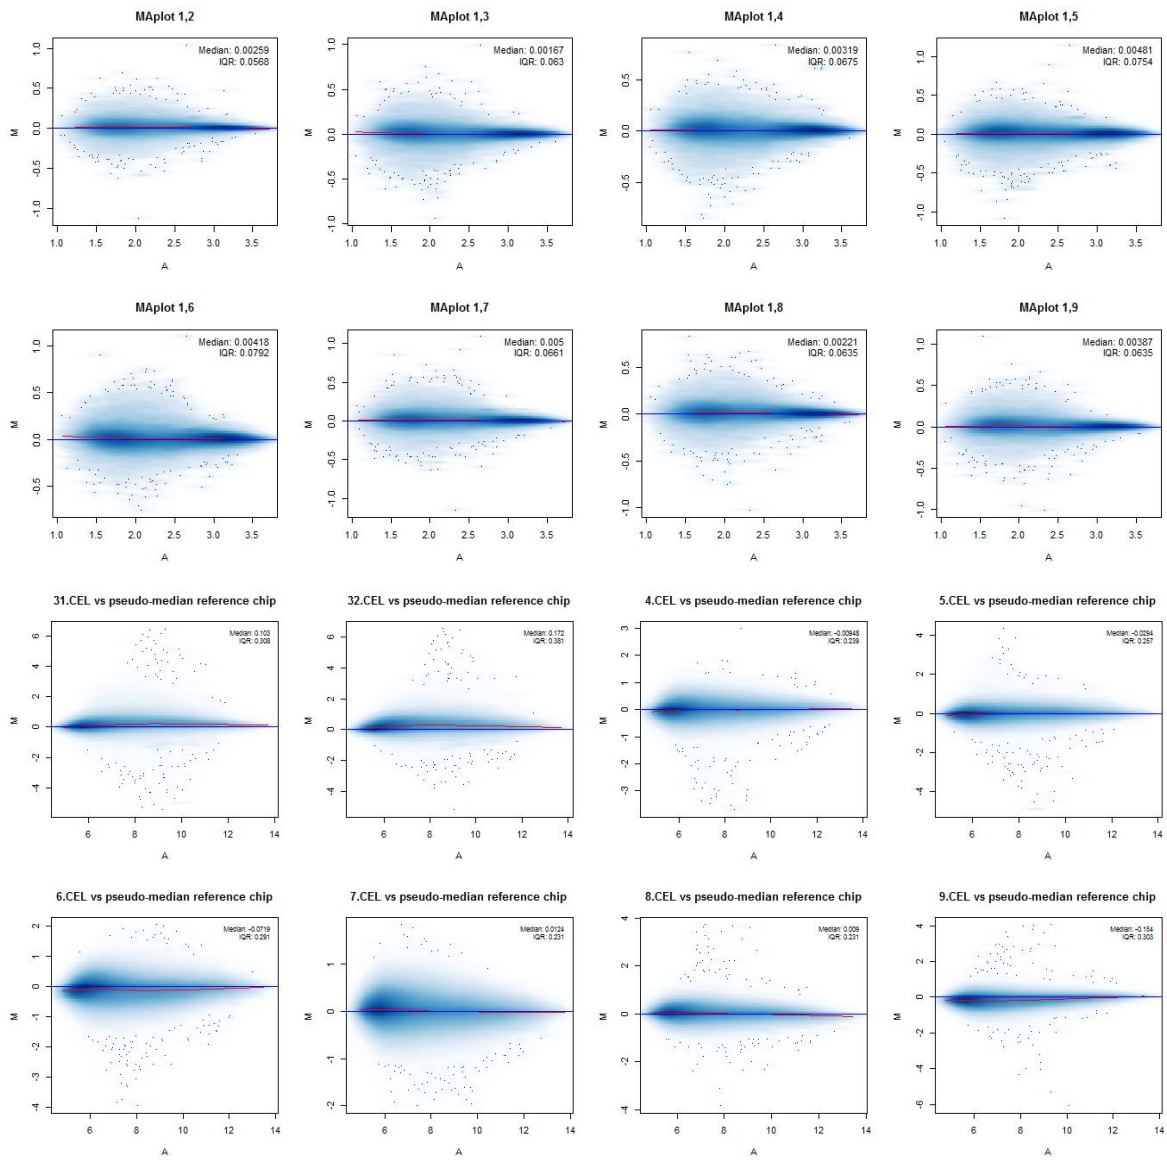

**S1 Figs.** This file includes array images, MA plots, box plots and data histograms before and after normalization

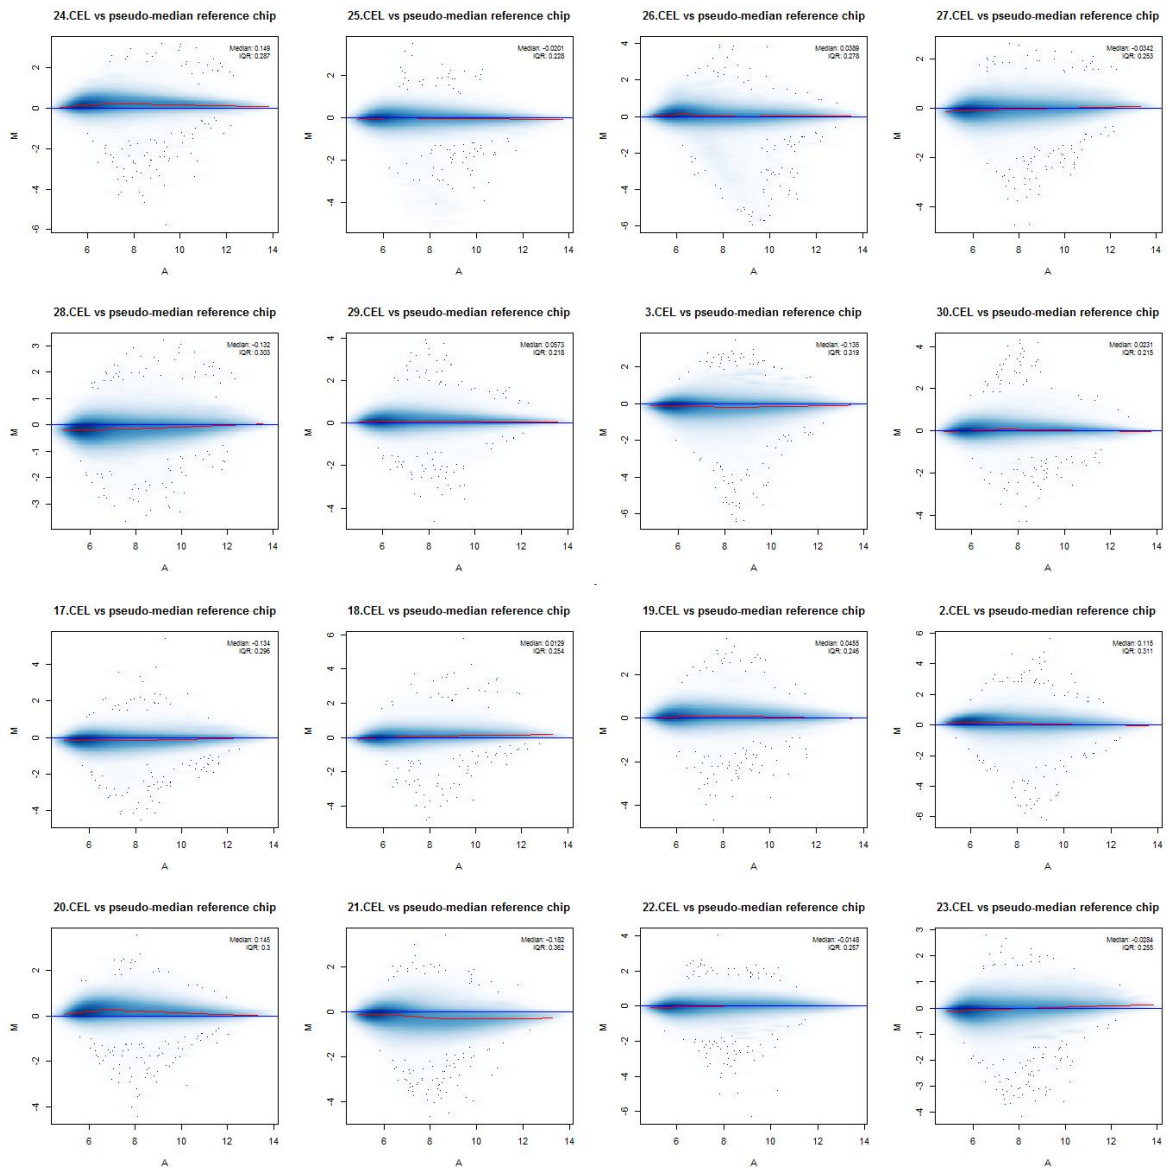

**S1 Figs.** This file includes array images, MA plots, box plots and data histograms before and after normalization

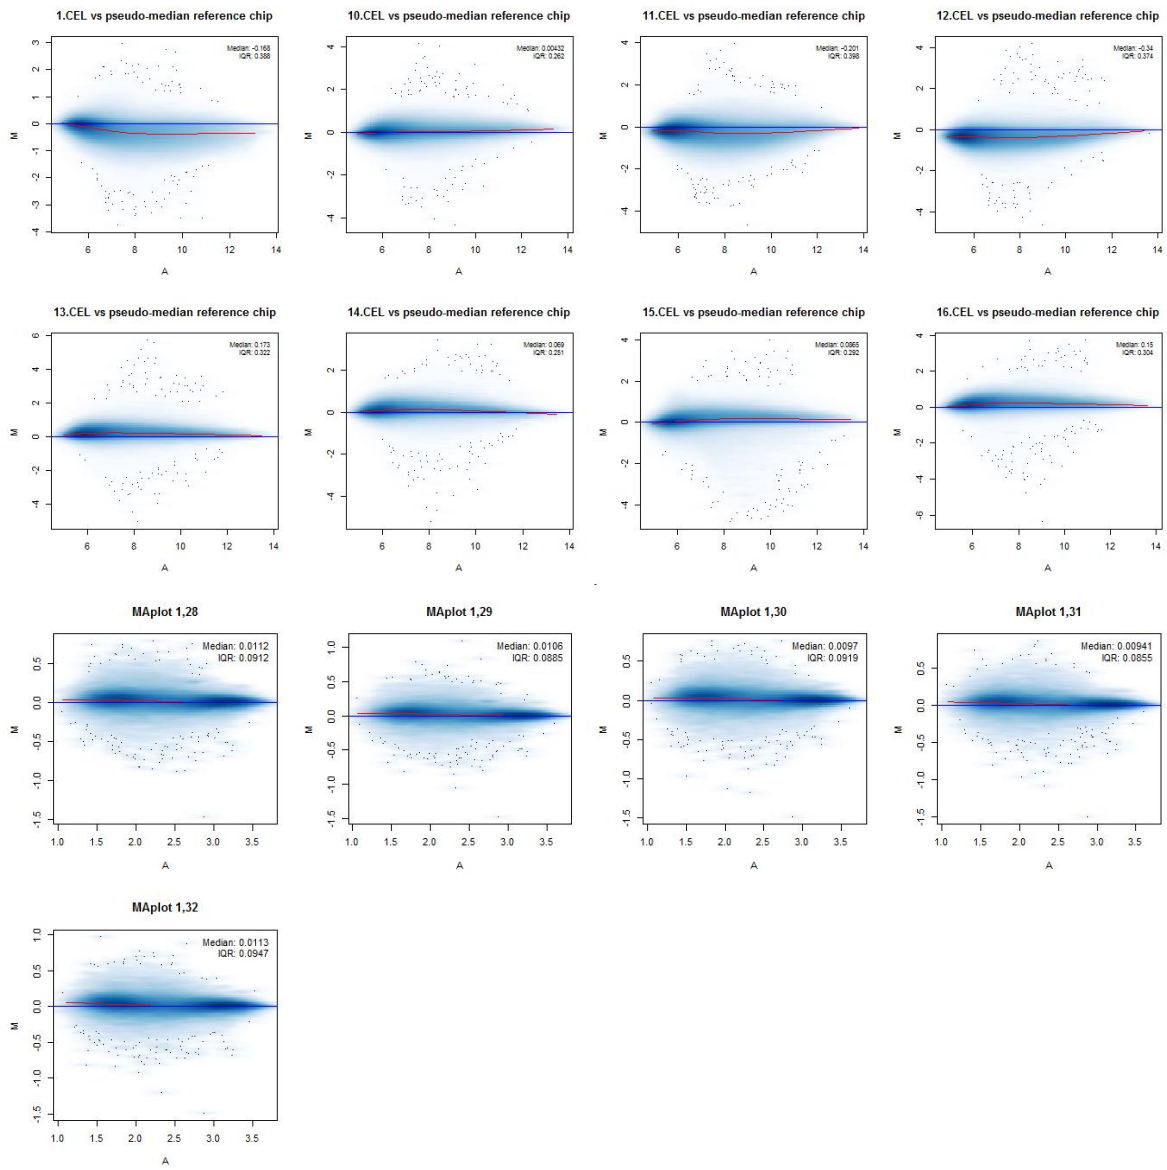



**S1 Figs.** This file includes array images, MA plots, box plots and data histograms before and after normalization

**Box plots.** Box plot before normalization (A); Box plot after normalization (B).

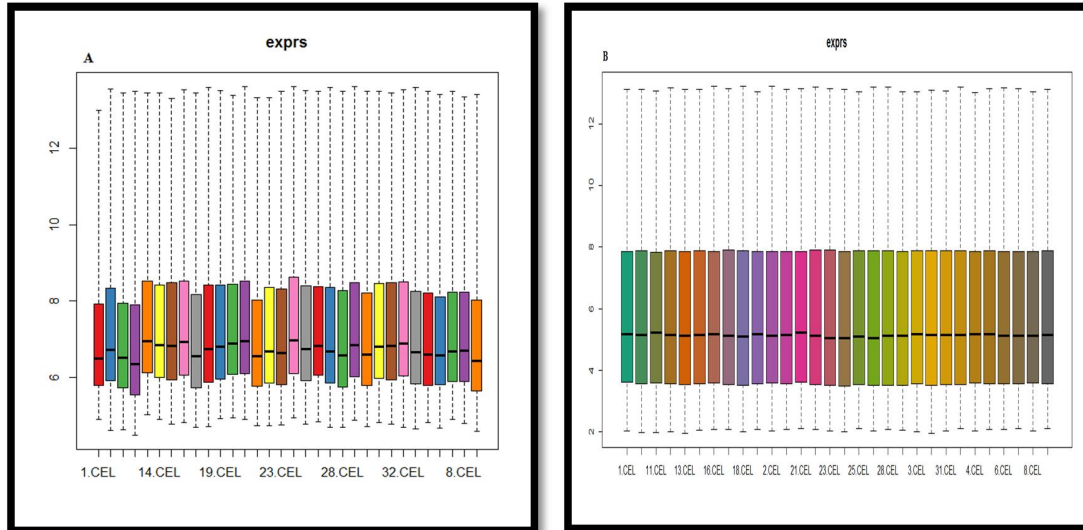

**Histograms.** Histogram before normalization (A); Histogram after normalization (B).

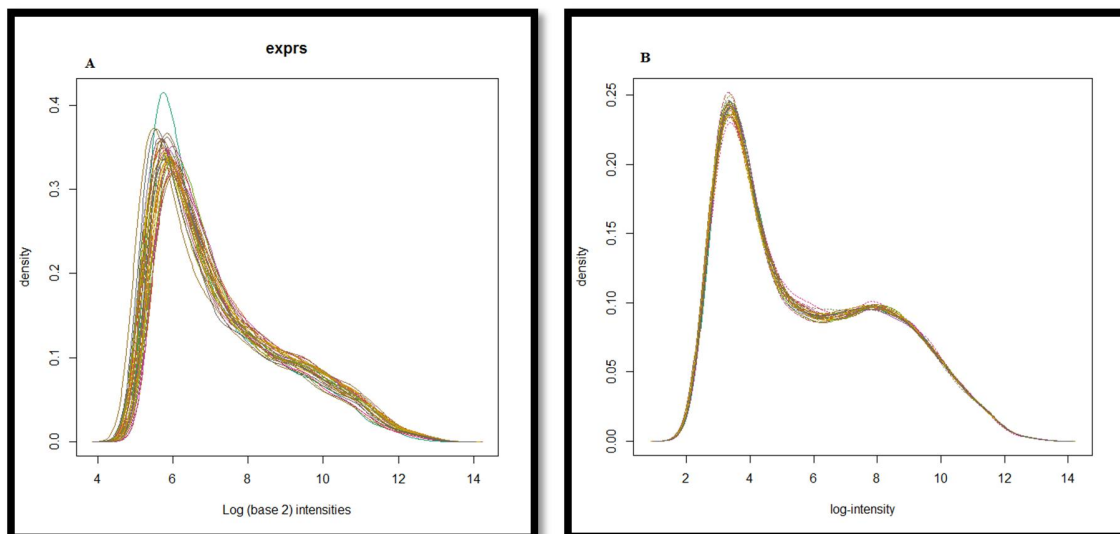

Supplement: pone.0184697.s006.pdf [file pone.0184697.s006.pdf]
