# Supplementary material for: Three-way interaction model to trace the mechanisms involved in Alzheimer’s disease transgenic mice
Source: PubMed Central journal article supplement (PMC5608283; doi:10.1371/journal.pone.0184697), 2017-09-21
Supplement: pone.0184697.s001.pdf [file pone.0184697.s001.pdf]

S1 Table

| Gene ID  | logFC     | AveExpr  | t         | P.Value  | adj.P.Val | B        |
|----------|-----------|----------|-----------|----------|-----------|----------|
| 10476314 | -0.856701 | 11.71713 | -25.86958 | 9.93E-23 | 2.04E-18  | 28.80812 |
| 10440491 | -0.357787 | 12.22343 | -14.99706 | 7.35E-16 | 7.55E-12  | 21.08195 |
| 10462140 | -0.295892 | 5.642927 | -6.413136 | 3.60E-07 | 0.0024666 | 6.139441 |
| 10597323 | 0.29213   | 10.57244 | 6.098439  | 8.83E-07 | 0.0045329 | 5.376427 |
| 10476945 | -3.092731 | 5.391644 | -5.893587 | 1.59E-06 | 0.0065205 | 4.874309 |
| 10389222 | -1.202551 | 5.550457 | -5.743021 | 2.45E-06 | 0.0083746 | 4.502922 |
| 10508074 | -0.590065 | 5.306639 | -5.428505 | 6.06E-06 | 0.0177627 | 3.722035 |
| 10461721 | -0.760083 | 7.08012  | -5.310745 | 8.51E-06 | 0.0215702 | 3.428318 |
| 10424349 | -0.268076 | 9.074391 | -5.25934  | 9.87E-06 | 0.0215702 | 3.299942 |
| 10447602 | 0.219145  | 8.581799 | 5.237547  | 1.05E-05 | 0.0215702 | 3.245493 |
| 10389231 | -2.264374 | 6.525541 | -5.142362 | 1.38E-05 | 0.023655  | 3.007538 |
| 10440393 | -0.440652 | 5.488662 | -5.144896 | 1.37E-05 | 0.023655  | 3.013876 |
| 10397645 | -0.357986 | 3.392303 | -5.063509 | 1.74E-05 | 0.02741   | 2.810291 |
| 10548375 | -1.215191 | 4.189705 | -4.982532 | 2.19E-05 | 0.0284404 | 2.60768  |
| 10557895 | -1.023737 | 4.222646 | -4.957605 | 2.36E-05 | 0.0284404 | 2.54531  |
| 10360040 | -0.471475 | 7.491854 | -4.983547 | 2.19E-05 | 0.0284404 | 2.610221 |
| 10441003 | -0.382196 | 5.27729  | -4.95879  | 2.35E-05 | 0.0284404 | 2.548276 |
| 10425866 | -0.372952 | 6.52628  | -4.86068  | 3.11E-05 | 0.0355032 | 2.302839 |
| 10347335 | -0.711768 | 5.56916  | -4.759682 | 4.16E-05 | 0.0367281 | 2.050349 |
| 10459866 | -0.470627 | 7.939773 | -4.78171  | 3.91E-05 | 0.0367281 | 2.105397 |
| 10545101 | -0.413176 | 6.529246 | -4.748766 | 4.29E-05 | 0.0367281 | 2.023075 |
| 10519951 | -0.230227 | 6.371864 | -4.760256 | 4.15E-05 | 0.0367281 | 2.051784 |
| 10505517 | -0.222519 | 3.985566 | -4.798915 | 3.72E-05 | 0.0367281 | 2.1484   |
| 10445753 | 0.163737  | 3.690067 | 4.80479   | 3.66E-05 | 0.0367281 | 2.163088 |
| 10461558 | -0.483561 | 5.09931  | -4.724831 | 4.60E-05 | 0.0377663 | 1.963287 |
| 10445781 | -0.727762 | 7.843383 | -4.690719 | 5.07E-05 | 0.0395611 | 1.878114 |
| 10404606 | -0.645737 | 9.288288 | -4.656874 | 5.59E-05 | 0.0395611 | 1.793653 |
| 10422496 | -0.357961 | 5.018882 | -4.658394 | 5.56E-05 | 0.0395611 | 1.797444 |
| 10532744 | -0.277113 | 8.501885 | -4.678997 | 5.25E-05 | 0.0395611 | 1.848856 |
| 10351658 | -0.422659 | 4.132633 | -4.626162 | 6.10E-05 | 0.0404115 | 1.717052 |
| 10444284 | -0.368471 | 4.540117 | -4.637457 | 5.91E-05 | 0.0404115 | 1.74522  |
| 10406928 | -0.899604 | 6.544058 | -4.604809 | 6.49E-05 | 0.0416159 | 1.663822 |
| 10496975 | -0.297887 | 6.91831  | -4.553565 | 7.51E-05 | 0.046723  | 1.536179 |
| 10412123 | -0.326693 | 5.641624 | -4.537848 | 7.86E-05 | 0.0474313 | 1.497059 |
| 10439312 | -0.373165 | 5.036889 | -4.516521 | 8.35E-05 | 0.0477534 | 1.444    |
| 10360227 | -0.123109 | 10.94676 | -4.515459 | 8.37E-05 | 0.0477534 | 1.441359 |
| 10416437 | -0.371058 | 6.610778 | -4.489276 | 9.02E-05 | 0.0487491 | 1.376262 |
| 10593646 | -0.173563 | 7.551304 | -4.498131 | 8.80E-05 | 0.0487491 | 1.398273 |
