# Supplementary material for: Three-way interaction model to trace the mechanisms involved in Alzheimer’s disease transgenic mice
Source: PubMed Central journal article supplement (PMC5608283; doi:10.1371/journal.pone.0184697), 2017-09-21
Supplement: pone.0184697.s002.pdf [file pone.0184697.s002.pdf]

S2 Table

| Trip | X1 or X2                | X2 or X1      | X3        | rhodiff | MLA value | estimates | san.se | wald   | pv       | model | FDR(BH)  |
|------|-------------------------|---------------|-----------|---------|-----------|-----------|--------|--------|----------|-------|----------|
| 1    | Bcl2a1c                 | Syngn2        | Csf3r     | 1.4356  | 0.5195    | 1.2065    | 0.1938 | 38.746 | 4.83E-10 | F     | 1.56E-04 |
| 2    | Art2a-ps                | Evc2          | Tnfaip8l3 | 1.4687  | 0.5078    | 2.3485    | 0.3801 | 38.176 | 6.46E-10 | F     | 1.56E-04 |
| 3    | Nanp                    | Tceb1         | Cd180     | -1.5803 | -0.5427   | -2.7804   | 0.456  | 37.172 | 1.08E-09 | F     | 1.56E-04 |
| 4    | Cops7b                  | Cldn9         | Prnp      | -1.5663 | -0.5146   | -1.6122   | 0.2654 | 36.902 | 1.24E-09 | F     | 1.56E-04 |
| 5    | Sdsl                    | Apom          | Prnp      | 1.5933  | 0.5466    | 1.9744    | 0.3277 | 36.304 | 1.69E-09 | F     | 1.56E-04 |
| 6    | Cfap20                  | Slc45a1       | Slc14a1   | -1.5898 | -0.5718   | -2.5907   | 0.4301 | 36.288 | 1.70E-09 | F     | 1.56E-04 |
| 7    | Aldoc                   | Cadm4         | Lcp1      | 1.2552  | 0.5257    | 1.1067    | 0.1837 | 36.278 | 1.71E-09 | F     | 1.56E-04 |
| 8    | Zfp930                  | Zfp507        | Dock8     | -1.224  | -0.5142   | -1.4478   | 0.2404 | 36.254 | 1.73E-09 | F     | 1.56E-04 |
| 9    | Alox12e                 | Rbm33         | Gpr183    | 1.8119  | 0.553     | 2.9552    | 0.4932 | 35.901 | 2.08E-09 | F     | 1.66E-04 |
| 10   | Cebpz                   | Zfp408        | Parvg     | -1.4396 | -0.5444   | -2.0229   | 0.3391 | 35.594 | 2.43E-09 | F     | 1.75E-04 |
| 11   | Ctsd                    | Spsb4         | Ezr       | 1.2899  | 0.5343    | 1.6016    | 0.2707 | 35.01  | 3.28E-09 | F     | 2.15E-04 |
| 12   | Ndp                     | Vps51         | Slc14a1   | -1.3078 | -0.5508   | -1.996    | 0.3406 | 34.338 | 4.63E-09 | F     | 2.78E-04 |
| 13   | H2-Ob                   | Irf8          | App       | 1.661   | 0.5744    | 2.7596    | 0.4722 | 34.152 | 5.10E-09 | F     | 2.82E-04 |
| 14   | Gm10620                 | Eif5          | Pea15a    | -1.3896 | -0.5893   | -1.2601   | 0.2172 | 33.649 | 6.60E-09 | F     | 3.31E-04 |
| 15   | E330034G19Rik           | Sned1         | Ccl6      | -0.9592 | -0.5399   | -1.0875   | 0.1877 | 33.565 | 6.89E-09 | F     | 3.31E-04 |
| 16   | Il15                    | Letm1         | Dock8     | -1.5282 | -0.5473   | -2.5142   | 0.4396 | 32.716 | 1.07E-08 | F     | 4.57E-04 |
| 17   | Klf12                   | Mir21a        | Parvg     | 1.5124  | 0.5308    | 2.6641    | 0.4659 | 32.694 | 1.08E-08 | F     | 4.57E-04 |
| 18   | Zbtb7c                  | Itpripl2      | Tlr4      | 1.7239  | 0.5482    | 2.5822    | 0.4532 | 32.469 | 1.21E-08 | F     | 4.85E-04 |
| 19   | chr16:91712003-91712125 | Ninl          | Prnp      | 1.453   | 0.5209    | 2.1692    | 0.3823 | 32.196 | 1.39E-08 | F     | 5.28E-04 |
| 20   | Acvr1b                  | 1500011B03Rik | Slc11a1   | -1.6539 | -0.5527   | -2.8312   | 0.4997 | 32.099 | 1.47E-08 | F     | 5.28E-04 |
| 21   | Atp9a                   | D030056L22Rik | Gsap      | 1.6195  | 0.5524    | 1.8597    | 0.33   | 31.761 | 1.74E-08 | F     | 5.83E-04 |
| 22   | Hyou1                   | Tgfbr1        | Ezr       | 1.3439  | 0.5311    | 1.8944    | 0.3373 | 31.547 | 1.95E-08 | F     | 5.83E-04 |
| 23   | Eya3                    | Psg20         | Trem3     | -1.5519 | -0.5055   | -2.127    | 0.3787 | 31.545 | 1.95E-08 | F     | 5.83E-04 |
| 24   | Scnn1g                  | Mir141        | Slc11a1   | 1.5077  | 0.5181    | 1.6791    | 0.2995 | 31.438 | 2.06E-08 | F     | 5.83E-04 |
| 25   | Ncoa4                   | Bbs5          | Lcp1      | -1.3258 | -0.5536   | -2.0901   | 0.3728 | 31.427 | 2.07E-08 | F     | 5.83E-04 |
| 26   | Tm6sf2                  | Htr1a         | Tnfaip8l3 | -1.3284 | -0.525    | -1.6779   | 0.2998 | 31.331 | 2.18E-08 | F     | 5.83E-04 |
| 27   | 4930426L09Rik           | Osbpl6        | Cd48      | 1.3116  | 0.5255    | 1.2269    | 0.2192 | 31.323 | 2.18E-08 | F     | 5.83E-04 |
| 28   | Olfr304                 | Pde3a         | Cst7      | -1.5216 | -0.5544   | -2.3102   | 0.4146 | 31.055 | 2.51E-08 | F     | 6.37E-04 |
| 29   | Nckap1l                 | Rdh11         | Clec7a    | 1.402   | 0.5451    | 1.7974    | 0.3236 | 30.849 | 2.79E-08 | F     | 6.37E-04 |
| 30   | Serf1                   | Psd3          | Dock8     | 1.5495  | 0.5112    | 1.7866    | 0.322  | 30.779 | 2.89E-08 | F     | 6.37E-04 |
| 31   | Olfr292                 | Mir144        | Tnfaip8l3 | -1.4088 | -0.5012   | -1.8151   | 0.3273 | 30.759 | 2.92E-08 | F     | 6.37E-04 |

|    |               |               |         |         |         |         |        |        |          |   |          |
|----|---------------|---------------|---------|---------|---------|---------|--------|--------|----------|---|----------|
| 32 | E230016K23Rik | Tmem26        | Gpr65   | -1.6394 | -0.5692 | -3.4107 | 0.6154 | 30.715 | 2.99E-08 | F | 6.37E-04 |
| 33 | Inpp5b        | Ap2s1         | Slc14a1 | -1.3555 | -0.5506 | -1.8495 | 0.3337 | 30.714 | 2.99E-08 | F | 6.37E-04 |
| 34 | Fabp1         | Rela          | Sqle    | -1.6218 | -0.5132 | -2.594  | 0.4684 | 30.667 | 3.06E-08 | F | 6.37E-04 |
| 35 | Slc35e4       | Fopnl         | Gpr183  | -1.1649 | -0.5387 | -1.313  | 0.2372 | 30.645 | 3.10E-08 | F | 6.37E-04 |
| 36 | Olfr555       | 1700080E11Rik | Gsap    | 1.5273  | 0.5675  | 2.4172  | 0.4381 | 30.436 | 3.45E-08 | F | 6.60E-04 |
| 37 | Tmprss11g     | Fam175a       | Ly86    | -1.1073 | -0.5339 | -1.4578 | 0.2644 | 30.395 | 3.52E-08 | F | 6.60E-04 |
| 38 | Cyp2j13       | Txndc8        | Slc15a3 | -1.5847 | -0.5234 | -2.3436 | 0.4251 | 30.394 | 3.53E-08 | F | 6.60E-04 |
| 39 | Tram1l1       | 9230110C19Rik | Ncf2    | -1.3471 | -0.523  | -1.807  | 0.3281 | 30.338 | 3.63E-08 | F | 6.60E-04 |
| 40 | Nptx1         | Tyrp1         | Clec7a  | 1.4792  | 0.5176  | 2.6795  | 0.4866 | 30.318 | 3.67E-08 | F | 6.60E-04 |
| 41 | Mmp8          | Gm839         | Slc11a1 | 1.4019  | 0.5162  | 1.8343  | 0.3339 | 30.176 | 3.95E-08 | F | 6.72E-04 |
| 42 | Olfr172       | Igfbpl1       | Ncf2    | -1.6657 | -0.6412 | -2.7298 | 0.4982 | 30.02  | 4.28E-08 | F | 6.72E-04 |
| 43 | Fam217a       | Slc39a4       | Gsap    | 1.4427  | 0.5559  | 1.986   | 0.3625 | 30.017 | 4.28E-08 | F | 6.72E-04 |
| 44 | Sh3pxd2b      | Nup98         | Ncf2    | -1.5155 | -0.5373 | -2.3694 | 0.4326 | 29.994 | 4.33E-08 | F | 6.72E-04 |
| 45 | Klf12         | Rasd2         | Parvg   | 1.5408  | 0.5256  | 2.702   | 0.4937 | 29.955 | 4.42E-08 | F | 6.72E-04 |
| 46 | Nsdhl         | Ccl9          | App     | 1.5275  | 0.5406  | 2.1232  | 0.3881 | 29.928 | 4.48E-08 | F | 6.72E-04 |
| 47 | Abcf2         | Sec24a        | Dock8   | -1.5758 | -0.5307 | -2.2136 | 0.4048 | 29.899 | 4.55E-08 | F | 6.72E-04 |
| 48 | Ldlr          | Fyb           | H2-Ob   | 1.0407  | 0.5684  | 1.499   | 0.2742 | 29.894 | 4.56E-08 | F | 6.72E-04 |
| 49 | Trpm6         | Spink2        | Parvg   | -1.6765 | -0.5448 | -2.356  | 0.4309 | 29.889 | 4.58E-08 | F | 6.72E-04 |
| 50 | Park7         | Fam120b       | Slc14a1 | 1.6956  | 0.564   | 2.3449  | 0.43   | 29.736 | 4.95E-08 | F | 7.13E-04 |
| 51 | Olfr346       | Dcaf8         | Csf3r   | -1.601  | -0.5902 | -2.1458 | 0.3941 | 29.648 | 5.18E-08 | F | 7.20E-04 |
| 52 | Mroh4         | Alpk1         | Ly86    | -1.5616 | -0.5399 | -1.6435 | 0.3019 | 29.64  | 5.20E-08 | F | 7.20E-04 |
| 53 | Olfr146       | Acbd6         | Mpeg1   | -1.4778 | -0.5688 | -2.2532 | 0.4149 | 29.49  | 5.62E-08 | F | 7.51E-04 |
| 54 | Vmn2r-ps57    | Prokr1        | Cst7    | 1.4603  | 0.5641  | 3.1555  | 0.5811 | 29.485 | 5.63E-08 | F | 7.51E-04 |
| 55 | Hrct1         | Mir448        | Ccl6    | 1.4167  | 0.5663  | 2.0305  | 0.3744 | 29.41  | 5.86E-08 | F | 7.60E-04 |
| 56 | Flcn          | Tjp3          | App     | 1.6352  | 0.5181  | 2.4226  | 0.4468 | 29.393 | 5.91E-08 | S | 7.60E-04 |
| 57 | Ccr1l1        | Cox8c         | App     | 1.3424  | 0.553   | 1.4076  | 0.2601 | 29.275 | 6.28E-08 | F | 7.73E-04 |
| 58 | Blmh          | Mknk2         | Csf3r   | -1.4651 | -0.513  | -2.0841 | 0.3852 | 29.273 | 6.29E-08 | F | 7.73E-04 |
| 59 | Hirip3        | Tmem79        | Arpp21  | 1.4509  | 0.5304  | 2.0352  | 0.3769 | 29.164 | 6.65E-08 | F | 7.73E-04 |
| 60 | Pglyrp1       | Klf6          | Runx1   | -1.581  | -0.5814 | -1.9486 | 0.3609 | 29.159 | 6.67E-08 | S | 7.73E-04 |
| 61 | Smek3         | 2900060B14Rik | Lcp1    | 1.6397  | 0.5261  | 2.0033  | 0.3711 | 29.147 | 6.71E-08 | F | 7.73E-04 |
| 62 | Pgc           | 5430411C19Rik | Slc11a1 | -1.3229 | -0.5374 | -1.9758 | 0.3662 | 29.118 | 6.81E-08 | F | 7.73E-04 |
| 63 | Ccdc108       | Qtrt1         | Pea15a  | 0.9842  | 0.5458  | 1.4812  | 0.2748 | 29.048 | 7.06E-08 | F | 7.73E-04 |
| 64 | Nxn1          | Kcnq4         | Mpeg1   | -1.3653 | -0.5174 | -1.894  | 0.3514 | 29.044 | 7.07E-08 | F | 7.73E-04 |

|    |               |               |         |         |         |         |        |        |          |   |          |
|----|---------------|---------------|---------|---------|---------|---------|--------|--------|----------|---|----------|
| 65 | Lamb1         | Tgfb1         | Mpeg1   | -1.647  | -0.5326 | -2.3672 | 0.4394 | 29.019 | 7.17E-08 | F | 7.73E-04 |
| 66 | Klf14         | Pop4          | Dock8   | -1.5122 | -0.5168 | -1.5847 | 0.2943 | 29.002 | 7.23E-08 | F | 7.73E-04 |
| 67 | Lgi2          | Spata31d1a    | Arpp21  | 1.5064  | 0.5019  | 2.5012  | 0.4645 | 28.996 | 7.25E-08 | F | 7.73E-04 |
| 68 | Lce3a         | Rnf123        | Slc44a5 | -1.3278 | -0.526  | -1.4156 | 0.263  | 28.977 | 7.33E-08 | F | 7.73E-04 |
| 69 | Olfr339       | Lrrc61        | Ncf2    | -1.6347 | -0.5304 | -2.0293 | 0.3771 | 28.956 | 7.41E-08 | F | 7.73E-04 |
| 70 | Def6          | Fam3c         | Cd86    | 1.3811  | 0.5104  | 2.2839  | 0.4247 | 28.919 | 7.55E-08 | F | 7.76E-04 |
| 71 | Tjp3          | Polr2i        | Trem2   | 1.5891  | 0.5692  | 2.1291  | 0.3966 | 28.816 | 7.96E-08 | F | 7.93E-04 |
| 72 | Csf1r         | Milr1         | H2-Ob   | 1.4035  | 0.5577  | 1.282   | 0.239  | 28.777 | 8.12E-08 | F | 7.93E-04 |
| 73 | Mdn1          | Cacna1s       | Dock8   | 1.3427  | 0.5058  | 1.7017  | 0.3173 | 28.766 | 8.17E-08 | F | 7.93E-04 |
| 74 | Akap10        | Gm7337        | Parvg   | -1.347  | -0.5126 | -1.5573 | 0.2904 | 28.76  | 8.19E-08 | F | 7.93E-04 |
| 75 | Snora26       | Cblc          | Prnp    | -1.6031 | -0.5355 | -2.1009 | 0.3919 | 28.745 | 8.26E-08 | F | 7.93E-04 |
| 76 | Mir181d       | 9130019O22Rik | Slc14a1 | -1.5798 | -0.5805 | -2.08   | 0.3886 | 28.645 | 8.70E-08 | F | 8.19E-04 |
| 77 | Clec4a2       | Espn          | Selplg  | -1.6043 | -0.5417 | -1.8935 | 0.354  | 28.606 | 8.87E-08 | F | 8.19E-04 |
| 78 | Azi2          | Park7         | Slc14a1 | 1.5767  | 0.5756  | 2.7397  | 0.5124 | 28.589 | 8.95E-08 | F | 8.19E-04 |
| 79 | Psme3         | Alkbh6        | Slc14a1 | -1.5742 | -0.6181 | -2.2853 | 0.4275 | 28.581 | 8.98E-08 | F | 8.19E-04 |
| 80 | Ptcra         | Prss50        | Parvg   | -1.4589 | -0.5192 | -2.1557 | 0.4037 | 28.522 | 9.26E-08 | F | 8.34E-04 |
| 81 | Rabgap1       | Mir335        | Selplg  | -1.4897 | -0.5462 | -2.0929 | 0.3926 | 28.426 | 9.73E-08 | F | 8.65E-04 |
| 82 | Cbfa2t3       | Sfxn5         | Ezr     | 1.2484  | 0.5242  | 1.595   | 0.2999 | 28.279 | 1.05E-07 | F | 9.18E-04 |
| 83 | Fgfr1         | Dok3          | Cd180   | -1.7521 | -0.5488 | -1.7505 | 0.3293 | 28.253 | 1.06E-07 | S | 9.18E-04 |
| 84 | Aph1a         | Zfp451        | Lcp1    | 1.4926  | 0.5534  | 1.8556  | 0.3492 | 28.241 | 1.07E-07 | F | 9.18E-04 |
| 85 | Higd1a        | Eif1b         | Cd180   | 1.4772  | 0.5521  | 1.991   | 0.375  | 28.186 | 1.10E-07 | F | 9.34E-04 |
| 86 | Mpp4          | Spata5        | Selplg  | -1.4602 | -0.5272 | -2.0123 | 0.3794 | 28.136 | 1.13E-07 | F | 9.47E-04 |
| 87 | Anxa5         | Tjp3          | Ccl6    | -1.5402 | -0.5592 | -1.8927 | 0.3572 | 28.075 | 1.17E-07 | F | 9.64E-04 |
| 88 | Pim2          | Tes           | Slc15a3 | 1.383   | 0.5251  | 2.4624  | 0.4649 | 28.048 | 1.18E-07 | F | 9.64E-04 |
| 89 | Olfr117       | Defb20        | Cst7    | -1.3486 | -0.5326 | -2.0797 | 0.3928 | 28.035 | 1.19E-07 | F | 9.64E-04 |
| 90 | Pdcd1         | Tec           | Dock8   | 1.3736  | 0.5757  | 1.8156  | 0.343  | 28.013 | 1.20E-07 | F | 9.64E-04 |
| 91 | Olfr1044      | Cyp2c68       | Ccl3    | 1.6541  | 0.5302  | 3.5176  | 0.6651 | 27.976 | 1.23E-07 | F | 9.67E-04 |
| 92 | Gck           | 4930583I09Rik | Slc11a1 | -1.5431 | -0.5435 | -2.6901 | 0.5087 | 27.965 | 1.24E-07 | F | 9.67E-04 |
| 93 | Slc38a11      | Gpr125        | Slc14a1 | 1.6169  | 0.556   | 2.1402  | 0.4054 | 27.871 | 1.30E-07 | F | 9.78E-04 |
| 94 | Zfp367        | 4833413E03Rik | Gpr183  | 1.0974  | 0.5642  | 1.4361  | 0.272  | 27.869 | 1.30E-07 | F | 9.78E-04 |
| 95 | D130046C19Rik | Rbm15b        | Hpgds   | 1.3598  | 0.5228  | 1.4779  | 0.28   | 27.854 | 1.31E-07 | F | 9.78E-04 |
| 96 | Chrna6        | Ms4a8a        | Gpr65   | 1.4842  | 0.5402  | 1.9936  | 0.3778 | 27.846 | 1.31E-07 | F | 9.78E-04 |
| 97 | Hexb          | Slamf6        | Slc14a1 | 1.5072  | 0.5483  | 1.786   | 0.3385 | 27.833 | 1.32E-07 | F | 9.78E-04 |

|     |         |                         |         |         |         |         |        |        |          |   |          |
|-----|---------|-------------------------|---------|---------|---------|---------|--------|--------|----------|---|----------|
| 98  | Olfcr39 | Olig2                   | Slc44a5 | -1.3821 | -0.5226 | -2.0618 | 0.3909 | 27.821 | 1.33E-07 | F | 9.78E-04 |
| 99  | Nanog   | Zcchc4                  | Slc14a1 | -1.5406 | -0.55   | -2.8231 | 0.5355 | 27.796 | 1.35E-07 | F | 9.78E-04 |
| 100 | MARCH7  | chr11:57877333-57886439 | Trem3   | 1.5826  | 0.5093  | 2.1428  | 0.4066 | 27.774 | 1.36E-07 | F | 9.78E-04 |
| 101 | Gpbar1  | Pdcd5                   | Gsap    | -1.6387 | -0.6108 | -2.6192 | 0.4972 | 27.756 | 1.38E-07 | F | 9.78E-04 |
| 102 | Manba   | Mlxip                   | Gpr65   | -1.4611 | -0.5281 | -2.3495 | 0.4463 | 27.719 | 1.40E-07 | F | 9.78E-04 |
| 103 | Pex12   | Mir683-2                | Slc11a1 | 1.1168  | 0.5084  | 1.1654  | 0.2214 | 27.698 | 1.42E-07 | F | 9.78E-04 |
| 104 | Mat2b   | Mrpl18                  | Gpr183  | -1.6011 | -0.534  | -2.4947 | 0.4741 | 27.692 | 1.42E-07 | F | 9.78E-04 |
| 105 | Clcn7   | 1810011O10Rik           | Csf3r   | 1.4212  | 0.5557  | 2.0219  | 0.3844 | 27.673 | 1.44E-07 | F | 9.78E-04 |
| 106 | Zbtb7c  | Mill1                   | Gpr65   | -1.3709 | -0.5449 | -1.9675 | 0.374  | 27.669 | 1.44E-07 | F | 9.78E-04 |
