# Supplementary material for: Three-way interaction model to trace the mechanisms involved in Alzheimer’s disease transgenic mice
Source: PubMed Central journal article supplement (PMC5608283; doi:10.1371/journal.pone.0184697), 2017-09-21
Supplement: pone.0184697.s003.pdf [file pone.0184697.s003.pdf]

**S3 Tables: Comparison of gene set enrichment analysis results in group1,2 and random groups.**

For verifying that the large number of common terms in group 1(X3) and group2(X1, X2, X3) are not random, we extracted 30 random subsets from group 2, each subsets including 35 genes. After gene set enrichment analysis, very rare overlap was observed between group 2 and each of the random subsets. These results confirm that the large number of common terms in group 1 and 2 are not random.

R indicates Random groups; biological process, cellular component and pathway enrichment analysis results are available in Table 1,2 and 3 respectively.

**S3 Tables: Comparison of gene set enrichment analysis results in group1,2 and random groups.**

**Table1: results of biological process enrichment analysis.**

|                 | <b>GOID</b>                                                | <b>GOTerm</b>                                                        | <b>p-value</b> | <b>fdr(BH)</b> |
|-----------------|------------------------------------------------------------|----------------------------------------------------------------------|----------------|----------------|
|                 | <b>Biological Process Enrichment Analysis for X1,X2,X3</b> |                                                                      |                |                |
| <b>X1,X2,X3</b> | GO:0002286                                                 | T cell activation involved in immune response                        | 3.71E-02       | 9.75E-02       |
|                 | GO:1902106                                                 | negative regulation of leukocyte differentiation                     | 3.09E-02       | 8.80E-02       |
|                 | GO:0002763                                                 | positive regulation of myeloid leukocyte differentiation             | 1.09E-02       | 4.94E-02       |
|                 | GO:0043409                                                 | negative regulation of MAPK cascade                                  | 3.57E-02       | 9.65E-02       |
|                 | GO:0043410                                                 | positive regulation of MAPK cascade                                  | 2.73E-02       | 8.36E-02       |
|                 | GO:0030593                                                 | neutrophil chemotaxis                                                | 1.08E-04       | 4.53E-03       |
|                 | GO:0048245                                                 | eosinophil chemotaxis                                                | 4.87E-04       | 1.13E-02       |
|                 | GO:0042098                                                 | T cell proliferation                                                 | 6.81E-03       | 3.70E-02       |
|                 | GO:0001779                                                 | natural killer cell differentiation                                  | 1.74E-03       | 1.83E-02       |
|                 | GO:0002221                                                 | pattern recognition receptor signaling pathway                       | 3.12E-03       | 2.44E-02       |
|                 | GO:0045944                                                 | positive regulation of transcription from RNA polymerase II promoter | 3.73E-02       | 9.75E-02       |
|                 | GO:0070372                                                 | regulation of ERK1 and ERK2 cascade                                  | 6.61E-05       | 3.82E-03       |
|                 | GO:0061097                                                 | regulation of protein tyrosine kinase activity                       | 1.65E-02       | 6.20E-02       |
|                 | GO:0050730                                                 | regulation of peptidyl-tyrosine phosphorylation                      | 1.47E-02       | 5.94E-02       |
|                 | GO:0070232                                                 | regulation of T cell apoptotic process                               | 4.45E-03       | 2.94E-02       |
|                 | <b>Biological Process Enrichment Analysis for X3</b>       |                                                                      |                |                |
| <b>X3</b>       | GO:0070372                                                 | regulation of ERK1 and ERK2 cascade                                  | 2.6082E-08     | 2.55604E-07    |
|                 | GO:0030593                                                 | neutrophil chemotaxis                                                | 4.17E-06       | 1.07E-05       |
|                 | GO:0042098                                                 | T cell proliferation                                                 | 9.53E-05       | 1.37E-04       |
|                 | GO:0002221                                                 | pattern recognition receptor signaling pathway                       | 3.48E-04       | 4.26E-04       |

**S3 Tables: Comparison of gene set enrichment analysis results in group1,2 and random groups.**

**Table1: results of biological process enrichment analysis.**

| <b>Biological Process Enrichment Analysis for Random Subsets</b> |            |                                                 |          |          |
|------------------------------------------------------------------|------------|-------------------------------------------------|----------|----------|
| <b>R1</b>                                                        | GO:0070371 | ERK1 and ERK2 cascade                           | 3.03E-03 | 3.36E-03 |
|                                                                  | GO:0070372 | regulation of ERK1 and ERK2 cascade             | 2.54E-03 | 3.17E-03 |
|                                                                  | GO:0070374 | positive regulation of ERK1 and ERK2 cascade    | 9.15E-04 | 1.83E-03 |
| <b>R2</b>                                                        | GO:0050730 | regulation of peptidyl-tyrosine phosphorylation | 2.49E-03 | 5.81E-03 |
|                                                                  | GO:0070371 | ERK1 and ERK2 cascade                           | 3.63E-03 | 3.63E-03 |
|                                                                  | GO:0070372 | regulation of ERK1 and ERK2 cascade             | 3.04E-03 | 3.55E-03 |
| <b>R3</b>                                                        |            | Without Enriched Biological Process             |          |          |
| <b>R4</b>                                                        |            | Without Enriched Biological Process             |          |          |
| <b>R5</b>                                                        |            | Without Enriched Biological Process             |          |          |
| <b>R6</b>                                                        |            | Without Enriched Biological Process             |          |          |
| <b>R7</b>                                                        |            | Without Enriched Biological Process             |          |          |
| <b>R8</b>                                                        |            | Without Enriched Biological Process             |          |          |
| <b>R9</b>                                                        |            | Without Enriched Biological Process             |          |          |
| <b>R10</b>                                                       |            | Without Enriched Biological Process             |          |          |
| <b>R11</b>                                                       |            | Without Enriched Biological Process             |          |          |
| <b>R12</b>                                                       |            | Without Enriched Biological Process             |          |          |
|                                                                  | GO:0002221 | pattern recognition receptor signaling pathway  | 3.10E-04 | 6.58E-04 |

**S3 Tables: Comparison of gene set enrichment analysis results in group1,2 and random groups.**

**Table1: results of biological process enrichment analysis.**

|            |            |                                                                 |             |             |
|------------|------------|-----------------------------------------------------------------|-------------|-------------|
| <b>R13</b> | GO:0002286 | T cell activation involved in immune response                   | 1.75E-04    | 5.95E-04    |
|            | GO:0070371 | ERK1 and ERK2 cascade                                           | 2.39E-04    | 5.81E-04    |
|            | GO:0070372 | regulation of ERK1 and ERK2 cascade                             | 1.89E-04    | 5.35E-04    |
|            | GO:0070374 | positive regulation of ERK1 and ERK2 cascade                    | 4.79E-05    | 2.71E-04    |
|            | GO:0071902 | positive regulation of protein serine/threonine kinase activity | 3.42E-03    | 3.75E-03    |
| <b>R14</b> |            | Without Enriched Biological Process                             |             |             |
| <b>R15</b> | GO:0070588 | calcium ion transmembrane transport                             | 0.003736718 | 0.004670897 |
| <b>R16</b> |            | Without Enriched Biological Process                             |             |             |
| <b>R17</b> |            | Without Enriched Biological Process                             |             |             |
| <b>R18</b> |            | Without Enriched Biological Process                             |             |             |
| <b>R19</b> | GO:0070371 | ERK1 and ERK2 cascade                                           | 3.32E-03    | 4.15E-03    |
|            | GO:0070372 | regulation of ERK1 and ERK2 cascade                             | 2.78E-03    | 4.64E-03    |
| <b>R20</b> | GO:0070371 | ERK1 and ERK2 cascade                                           | 3.63E-03    | 5.02E-03    |
|            | GO:0070372 | regulation of ERK1 and ERK2 cascade                             | 3.04E-03    | 4.57E-03    |
| <b>R21</b> | GO:0045639 | positive regulation of myeloid cell differentiation             | 2.08E-04    | 2.70E-03    |
| <b>R22</b> | GO:0045619 | regulation of lymphocyte differentiation                        | 7.93E-04    | 1.47E-03    |
|            | GO:0001779 | natural killer cell differentiation                             | 5.49E-06    | 4.76E-05    |
|            | GO:0030217 | T cell differentiation                                          | 2.92E-03    | 3.62E-03    |
|            | GO:0046631 | alpha-beta T cell activation                                    | 4.69E-04    | 1.22E-03    |
| <b>R23</b> |            | Without Enriched Biological Process                             |             |             |

**S3 Tables: Comparison of gene set enrichment analysis results in group1,2 and random groups.**

**Table1: results of biological process enrichment analysis.**

|            |            |                                              |          |          |
|------------|------------|----------------------------------------------|----------|----------|
|            |            |                                              |          |          |
| <b>R24</b> |            | Without Enriched Biological Process          |          |          |
|            |            |                                              |          |          |
| <b>R25</b> |            | Without Enriched Biological Process          |          |          |
|            |            |                                              |          |          |
| <b>R26</b> |            | Without Enriched Biological Process          |          |          |
|            |            |                                              |          |          |
| <b>R27</b> |            | Without Enriched Biological Process          |          |          |
|            |            |                                              |          |          |
| <b>R28</b> |            | Without Enriched Biological Process          |          |          |
|            |            |                                              |          |          |
| <b>R29</b> | GO:0070371 | ERK1 and ERK2 cascade                        | 3.63E-03 | 4.35E-03 |
|            | GO:0070372 | regulation of ERK1 and ERK2 cascade          | 3.04E-03 | 4.06E-03 |
|            | GO:0070374 | positive regulation of ERK1 and ERK2 cascade | 1.10E-03 | 3.31E-03 |
|            |            |                                              |          |          |
| <b>R30</b> |            | Without Enriched Biological Process          |          |          |

**S3 Tables: Comparison of gene set enrichment analysis results in group1,2 and random groups.**

**Table4: Random datasets**

|            |            |           |            |            |            |          |          |          |          |          |         |          |
|------------|------------|-----------|------------|------------|------------|----------|----------|----------|----------|----------|---------|----------|
| <b>R1</b>  | Zbtb7c     | Tnfaip8l3 | Tmem26     | Tgfbf      | Syng2      | Snora26  | Slc45a1  | Sec24a   | Sdsf     | Pea15a   | Olfr39  | Olfr292  |
| <b>R2</b>  | Tyrp1      | Trpm6     | Trem3      | Tnfaip8l3  | Tmem26     | Tgfbr1   | Tgfbf    | Sfxn5    | Sdsf     | Scnn1g   | Rdh11   | Olig2    |
| <b>R3</b>  | Zbtb7c     | Txndc8    | Tnfaip8l3  | Tjp3       | Spink2     | Sned1    | Slc39a4  | Slc15a3  | Sdsf     | Rbm33    | Olfr117 | Ninl     |
| <b>R4</b>  | Tram1l1    | Tceb1     | Sqlc       | Spata31d1a | Smek3      | Slc45a1  | Rdh11    | Prss50   | Prokr1   | Polr2i   | Pglyrp1 | Olfr292  |
| <b>R5</b>  | Zfp451     | Tyrp1     | Tmprss11g  | Tgfbf      | Syng2      | Spsb4    | Slc45a1  | Slc38a11 | Slc11a1  | Sh3pxd2b | Selplg  | Rbm15b   |
| <b>R6</b>  | Zfp930     | Tyrp1     | Trem2      | Tram1l1    | Tmem79     | Tmem26   | Tlr4     | Slc39a4  | Slc11a1  | Sdsf     | Runx1   | Ptcra    |
| <b>R7</b>  | Trem3      | Tmprss11g | Tjp3       | Sh3pxd2b   | Qtrt1      | Polr2i   | Pdcd1    | Parvg    | Olfr1044 | Nxn1     | Ncf2    | Mknk2    |
| <b>R8</b>  | Zfp451     | Zfp367    | Vps51      | Tram1l1    | Tnfaip8l3  | Tgfbr1   | Tgfbf    | Spink2   | Selplg   | Sdsf     | Ptcra   | Psme3    |
| <b>R9</b>  | Zfp507     | Zfp451    | Zfp367     | Serf1      | Sec24a     | Rela     | Rbm15b   | Rabgap1  | Ptcra    | Pop4     | Pdcd1   | Olig2    |
| <b>R10</b> | Zfp507     | Zfp408    | Vps51      | Vmn2r-ps57 | Spata31d1a | Slc14a1  | Serf1    | Rbm33    | Psg20    | Prokr1   | Prnp    | Pdcd1    |
| <b>R11</b> | Zfp408     | Zfp367    | Zcchc4     | Tram1l1    | Tgfbf      | Snora26  | Sec24a   | Rbm33    | Pglyrp1  | Pde3a    | Olfr292 | Nxn1     |
| <b>R12</b> | Tyrp1      | Trem3     | Tram1l1    | Tnfaip8l3  | Tgfbf      | Slc38a11 | Sfxn5    | Pop4     | Pim2     | Pex12    | Parvg   | Olfr39   |
| <b>R13</b> | Zfp408     | Tmem79    | Tlr4       | Syng2      | Spsb4      | Smek3    | Slc44a5  | Slamf6   | Sh3pxd2b | Rbm33    | Ptcra   | Pglyrp1  |
| <b>R14</b> | Zcchc4     | Zbtb7c    | Tmprss11g  | Tlr4       | Tes        | Sqlc     | Slc44a5  | Slc35e4  | Slc15a3  | Sh3pxd2b | Selplg  | Prss50   |
| <b>R15</b> | Zfp408     | Trpm6     | Trem2      | Tnfaip8l3  | Tjp3       | Sqlc     | Slc45a1  | Slc44a5  | Runx1    | Prokr1   | Pgc     | Pde3a    |
| <b>R16</b> | Zfp930     | Zfp451    | Trem2      | Tmprss11g  | Smek3      | Slc45a1  | Slc35e4  | Sdsf     | Rdh11    | Rbm15b   | Qtrt1   | Psme3    |
| <b>R17</b> | Zfp930     | Zfp367    | Zbtb7c     | Tes        | Spata31d1a | Slc39a4  | Slamf6   | Sh3pxd2b | Sfxn5    | Sec24a   | Runx1   | Pglyrp1  |
| <b>R18</b> | Zbtb7c     | Tmem79    | Spata31d1a | Slc35e4    | Sh3pxd2b   | Sdsf     | Rasd2    | Rabgap1  | Psme3    | Park7    | Olfr346 | Olfr1044 |
| <b>R19</b> | Zfp408     | Zfp367    | Vps51      | Tm6sf2     | Syng2      | Smek3    | Sfxn5    | Serf1    | Rnf123   | Rdh11    | Rabgap1 | Ptcra    |
| <b>R20</b> | Zfp451     | Trpm6     | Tram1l1    | Slc44a5    | Rela       | Pglyrp1  | Pgc      | Olfr339  | Olfr1044 | Ninl     | Mrpl18  | Mir141   |
| <b>R21</b> | Zfp408     | Tjp3      | Spata5     | Slamf6     | Rela       | Rbm15b   | Rabgap1  | Pim2     | Olfr304  | Nxn1     | Nckap1l | Nanp     |
| <b>R22</b> | Vps51      | Tnfaip8l3 | Tmem79     | Tgfbf      | Tes        | Tec      | Sqlc     | Spink2   | Snora26  | Slc15a3  | Slamf6  | Rdh11    |
| <b>R23</b> | Tnfaip8l3  | Tmprss11g | Tm6sf2     | Tgfbf      | Tceb1      | Spink2   | Sned1    | Smek3    | Slc11a1  | Rnf123   | Qtrt1   | Polr2i   |
| <b>R24</b> | Zfp930     | Tram1l1   | Slamf6     | Sh3pxd2b   | Sfxn5      | Sdsf     | Scnn1g   | Psme3    | Psd3     | Prnp     | Pex12   | Olfr339  |
| <b>R25</b> | Vmn2r-ps57 | Tyrp1     | Tram1l1    | Tjp3       | Slc14a1    | Slamf6   | Serf1    | Rnf123   | Psg20    | Psd3     | Prnp    | Polr2i   |
| <b>R26</b> | Zfp367     | Txndc8    | Tmprss11g  | Tmem79     | Slc45a1    | Slamf6   | Sh3pxd2b | Serf1    | Scnn1g   | Runx1    | Rbm15b  | Pdcd1    |
| <b>R27</b> | Zfp930     | Tec       | Tceb1      | Smek3      | Slc35e4    | Slc14a1  | Sdsf     | Polr2i   | Pim2     | Pex12    | Pdcd5   | Park7    |
| <b>R28</b> | Zfp930     | Zfp507    | Zfp408     | Vmn2r-ps57 | Tram1l1    | Tjp3     | Tes      | Syng2    | Slc44a5  | Slc35e4  | Ptcra   | Prokr1   |
| <b>R29</b> | Zfp930     | Zfp367    | Tyrp1      | Trem2      | Tjp3       | Syng2    | Slc11a1  | Sfxn5    | Psg20    | Pop4     | Polr2i  | Pea15a   |
| <b>R30</b> | Zfp451     | Zfp367    | Vmn2r-ps57 | Tmprss11g  | Tm6sf2     | Sned1    | Slc45a1  | Runx1    | Rnf123   | Qtrt1    | Psg20   | Pglyrp1  |

**S3 Tables: Comparison of gene set enrichment analysis results in group1,2 and random groups.**

**Table4: Random datasets**

|            |          |          |          |          |          |          |          |          |         |         |          |               |               |
|------------|----------|----------|----------|----------|----------|----------|----------|----------|---------|---------|----------|---------------|---------------|
| <b>R1</b>  | Ncoa4    | Nanog    | Mroh4    | Mmp8     | Mir144   | Milr1    | Kcnq4    | Itpripl2 | Igfbpl1 | Fopnl   | Fam3c    | Eif5          | E330034G19Rik |
| <b>R2</b>  | Olfr292  | Olfr117  | Nanp     | Ms4a8a   | Mrpl18   | Lcp1     | Lamb1    | Klf6     | Kcnq4   | Il15    | Htr1a    | Fam3c         | Ezr           |
| <b>R3</b>  | Nanp     | Mmp8     | Mlxip    | Mknk2    | Mir683-2 | Mir21a   | Mir181d  | Mir144   | Mir141  | Kcnq4   | Irf8     | Hrct1         | H2-Ob         |
| <b>R4</b>  | Olfr172  | Olfr146  | Nsdhl    | Nanog    | Mrpl18   | Mpp4     | Mir141   | Milr1    | Manba   | Kcnq4   | Gpr65    | Gpr125        | Fam120b       |
| <b>R5</b>  | Olfr339  | Olfr1044 | Nup98    | Ncf2     | Mrpl18   | Mir683-2 | Mir335   | Mat2b    | Manba   | Lce3a   | Itpripl2 | Irf8          | Inpp5b        |
| <b>R6</b>  | Prnp     | Pgc      | Pdcd1    | Parvg    | Olfr146  | Ncoa4    | Ms4a8a   | Mir683-2 | Ldlr    | Kcnq4   | Irf8     | Hirip3        | Gm7337        |
| <b>R7</b>  | Mir683-2 | Mir144   | Mir141   | Milr1    | Mill1    | Inpp5b   | Hpgds    | Hexb     | H2-Ob   | Gsap    | Gpr125   | Gpbar1        | Gm839         |
| <b>R8</b>  | Pea15a   | Nup98    | Ncf2     | Mknk2    | Mdn1     | Manba    | Gsap     | Gm839    | Flcn    | Eif5    | Ctsd     | Cst7          | Cldn9         |
| <b>R9</b>  | Olfr39   | Olfr346  | Nckap1l  | Ncf2     | Nanog    | Ms4a8a   | Mir683-2 | Milr1    | Mat2b   | Hyou1   | H2-Ob    | Fyb           | Fam217a       |
| <b>R10</b> | Olig2    | Ncoa4    | Nanp     | Mknk2    | Mir335   | Mdn1     | MARCH7   | Hyou1    | Hrct1   | H2-Ob   | Gpr125   | Gpbar1        | Fyb           |
| <b>R11</b> | Ninl     | Nanp     | Mlxip    | Mir335   | Mir181d  | Mir144   | Mdn1     | Letm1    | Kcnq4   | H2-Ob   | Gpr183   | Gm839         | Fam217a       |
| <b>R12</b> | Olfr292  | Nxnl1    | Ncf2     | Ms4a8a   | Mroh4    | Mpeg1    | Letm1    | Ldlr     | Lamb1   | Inpp5b  | Hyou1    | Flcn          | Eif5          |
| <b>R13</b> | Nsdhl    | Ncoa4    | Mmp8     | Mir683-2 | Mir21a   | Lrrc61   | Lcp1     | Klf12    | Hpgds   | Hirip3  | Higd1a   | Gpr125        | Gm10620       |
| <b>R14</b> | Pop4     | Pim2     | Pex12    | Pdcd1    | Park7    | Olfr555  | Mroh4    | Mir181d  | Klf6    | Igfbpl1 | Hexb     | Gsap          | Gm839         |
| <b>R15</b> | Pdcd1    | Osblp6   | Olfr346  | Olfr117  | Nptx1    | Mroh4    | Mlxip    | Mknk2    | Mill1   | Ly86    | Fabp1    | Eif1b         | Dok3          |
| <b>R16</b> | Osblp6   | Olfr292  | Nsdhl    | Ms4a8a   | Mrpl18   | Mroh4    | Mpp4     | Mir335   | Ldlr    | Inpp5b  | Higd1a   | Gm7337        | Fyb           |
| <b>R17</b> | Park7    | Nxnl1    | Nsdhl    | Ninl     | Nanp     | Mir683-2 | Mir141   | MARCH7   | Klf6    | Irf8    | Hrct1    | Fam120b       | Evc2          |
| <b>R18</b> | Mmp8     | Mir181d  | Mir144   | Ly86     | Klf12    | Il15     | Hrct1    | Hexb     | Gm10620 | Flcn    | Eya3     | Evc2          | E230016K23Rik |
| <b>R19</b> | Prss50   | Pop4     | Pdcd1    | Parvg    | Olfr555  | Olfr346  | Olfr146  | Mpp4     | Mir335  | Mir21a  | Lce3a    | Lamb1         | Inpp5b        |
| <b>R20</b> | Lrrc61   | Letm1    | Itpripl2 | Irf8     | Higd1a   | Hexb     | Gpr125   | Gpbar1   | Gm10620 | Fopnl   | Flcn     | Fam120b       | E230016K23Rik |
| <b>R21</b> | Nanog    | Mrpl18   | Letm1    | Ldlr     | Klf6     | Klf14    | Klf12    | Irf8     | Htr1a   | Higd1a  | Hexb     | Flcn          | Fam3c         |
| <b>R22</b> | Rasd2    | Ptcr     | Pglyrp1  | Pea15a   | Nsdhl    | Nckap1l  | Mir144   | Ldlr     | Il15    | Higd1a  | Gpr65    | Gm7337        | Eya3          |
| <b>R23</b> | Pdcd1    | Olfr346  | Olfr339  | Mroh4    | Mpp4     | MARCH7   | Manba    | Letm1    | Klf14   | Kcnq4   | Irf8     | Fabp1         | Eif5          |
| <b>R24</b> | Olfr172  | Mir683-2 | Mir21a   | Mir181d  | MARCH7   | Letm1    | Lcp1     | Igfbpl1  | Hpgds   | Hexb    | H2-Ob    | Gpr65         | Gpr125        |
| <b>R25</b> | Olfr39   | Olfr146  | Nanp     | MARCH7   | Ldlr     | Hirip3   | Higd1a   | Hexb     | Gpbar1  | Eif5    | Defb20   | D130046C19Rik | D030056L22Rik |
| <b>R26</b> | Park7    | Olfr292  | Olfr172  | Nptx1    | Ncf2     | Nanog    | Ms4a8a   | Mrpl18   | Lgi2    | Lce3a   | Inpp5b   | Gck           | Fyb           |
| <b>R27</b> | Olfr117  | Milr1    | Mdn1     | Manba    | Lgi2     | Klf6     | Klf12    | Hyou1    | Gpr65   | Gpr183  | Gpbar1   | Def6          | Cln7          |
| <b>R28</b> | Prnp     | Pop4     | Pglyrp1  | Pex12    | Pde3a    | Olfr339  | Olfr117  | Olfr1044 | Ndp     | Mpp4    | Mmp8     | Mir448        | Lamb1         |
| <b>R29</b> | Olfr346  | Mir448   | Mir21a   | Mdn1     | Manba    | Kcnq4    | Itpripl2 | Hirip3   | Hexb    | Gck     | Fopnl    | Fabp1         | Eif1b         |
| <b>R30</b> | Pex12    | Pdcd1    | Olfr555  | Olfr146  | Ndp      | Mroh4    | Mpeg1    | Mir448   | Mir335  | Mir144  | Milr1    | Mill1         | Klf12         |

**S3 Tables: Comparison of gene set enrichment analysis results in group1,2 and random groups.**

**Table4: Random datasets**

|            |                         |                         |                         |                         |                         |
|------------|-------------------------|-------------------------|-------------------------|-------------------------|-------------------------|
| <b>R1</b>  | Dock8                   | chr16:91712003-91712125 | chr11:57877333-57886439 | Cebpz                   | Ccr111                  |
| <b>R2</b>  | Eya3                    | Eif1b                   | E330034G19Rik           | Def6                    | Csf1r                   |
| <b>R3</b>  | Fam175a                 | Fabp1                   | D030056L22Rik           | Cacna1s                 | Aph1a                   |
| <b>R4</b>  | Eif1b                   | Cyp2c68                 | Csf1r                   | chr16:91712003-91712125 | Atp9a                   |
| <b>R5</b>  | Gpr65                   | Gpr125                  | Evc2                    | Def6                    | Ccr111                  |
| <b>R6</b>  | Espn                    | Eif1b                   | E330034G19Rik           | Cst7                    | Clcn7                   |
| <b>R7</b>  | Fgfr11                  | Fam175a                 | E330034G19Rik           | D030056L22Rik           | chr11:57877333-57886439 |
| <b>R8</b>  | chr11:57877333-57886439 | Cd86                    | Ccr111                  | Cacna1s                 | Azi2                    |
| <b>R9</b>  | Eif5                    | E230016K23Rik           | Cyp2c68                 | Chrna6                  | Ccl3                    |
| <b>R10</b> | Espn                    | Dock8                   | Cyp2j13                 | Cadm4                   | Cacna1s                 |
| <b>R11</b> | Defb20                  | chr16:91712003-91712125 | Ccl6                    | Cadm4                   | Atp9a                   |
| <b>R12</b> | E330034G19Rik           | Clec7a                  | Cldn9                   | chr16:91712003-91712125 | Cd48                    |
| <b>R13</b> | D130046C19Rik           | Csf1r                   | Cops7b                  | Cd86                    | Ccl6                    |
| <b>R14</b> | Gm7337                  | Dock8                   | Clec7a                  | chr16:91712003-91712125 | Bbs5                    |
| <b>R15</b> | Cyp2j13                 | Ctsd                    | Clcn7                   | chr16:91712003-91712125 | Cacna1s                 |
| <b>R16</b> | Flcn                    | Eif5                    | Eif1b                   | E230016K23Rik           | Ctsd                    |
| <b>R17</b> | Defb20                  | Clec4a2                 | Cldn9                   | Clcn7                   | Ccdc108                 |
| <b>R18</b> | Dcaf8                   | D130046C19Rik           | Clec7a                  | Cldn9                   | Chrna6                  |
| <b>R19</b> | Gck                     | Fyb                     | Ezr                     | Cyp2j13                 | Csf1r                   |
| <b>R20</b> | Cyp2j13                 | Csf1r                   | Clec4a2                 | Clcn7                   | Ccl3                    |
| <b>R21</b> | E230016K23Rik           | Defb20                  | Dcaf8                   | Csf1r                   | Clcn7                   |
| <b>R22</b> | Evc2                    | Defb20                  | Cox8c                   | Cd180                   | Bbs5                    |
| <b>R23</b> | Eif1b                   | Dok3                    | Clec7a                  | Cd86                    | Cd48                    |
| <b>R24</b> | Gck                     | Cops7b                  | Chrna6                  | Cfap20                  | Ap2s1                   |
| <b>R25</b> | Ctsd                    | Clec7a                  | Cebpz                   | Aph1a                   | Anxa5                   |
| <b>R26</b> | E230016K23Rik           | Dok3                    | Cst7                    | Cops7b                  | Ccdc108                 |
| <b>R27</b> | Cebpz                   | Ccr111                  | Art2a-ps                | App                     | Ap2s1                   |
| <b>R28</b> | Irf8                    | Flcn                    | Fabp1                   | D130046C19Rik           | Csf3r                   |
| <b>R29</b> | E230016K23Rik           | Cyp2j13                 | Cops7b                  | Chrna6                  | Cfap20                  |
| <b>R30</b> | H2-Ob                   | Gsap                    | Gpr125                  | Gm10620                 | Eif5                    |

**S3 Tables: Comparison of gene set enrichment analysis results in group1,2 and random groups.**

**Table4: Random datasets**

|            |                         |               |               |               |               |
|------------|-------------------------|---------------|---------------|---------------|---------------|
| <b>R1</b>  | Ccl9                    | Ccl6          | Azi2          | Alkbh6        | Abcf2         |
| <b>R2</b>  | Cox8c                   | Cblc          | Abcf2         | 9230110C19Rik | 5430411C19Rik |
| <b>R3</b>  | Alpk1                   | Acbd6         | 9130019O22Rik | 2900060B14Rik | 1700080E11Rik |
| <b>R4</b>  | Arpp21                  | Aph1a         | Acvr1b        | 9130019O22Rik | 4930583I09Rik |
| <b>R5</b>  | Ccl9                    | Cadm4         | App           | Abcf2         | 4833413E03Rik |
| <b>R6</b>  | Alkbh6                  | 9230110C19Rik | 5430411C19Rik | 4833413E03Rik | 1810011O10Rik |
| <b>R7</b>  | Ccdc108                 | App           | Ap2s1         | Akap10        | 4833413E03Rik |
| <b>R8</b>  | Aph1a                   | Aldoc         | Abcf2         | 4930426L09Rik | 1500011B03Rik |
| <b>R9</b>  | Cblc                    | Anxa5         | Alkbh6        | 4833413E03Rik | 2900060B14Rik |
| <b>R10</b> | Bbs5                    | Azi2          | Atp9a         | App           | Akap10        |
| <b>R11</b> | Arpp21                  | Alox12e       | 9130019O22Rik | 4930583I09Rik | 4833413E03Rik |
| <b>R12</b> | Ccr11                   | Bbs5          | Aph1a         | Alkbh6        | 4930583I09Rik |
| <b>R13</b> | Ccl3                    | Ccdc108       | Atp9a         | 9130019O22Rik | 4930426L09Rik |
| <b>R14</b> | Art2a-ps                | Alox12e       | Akap10        | 5430411C19Rik | 1500011B03Rik |
| <b>R15</b> | Anxa5                   | Alox12e       | Acbd6         | 9230110C19Rik | 1500011B03Rik |
| <b>R16</b> | Cd180                   | Ccr11         | Cbfa2t3       | Bbs5          | Alpk1         |
| <b>R17</b> | Aph1a                   | Alox12e       | Acbd6         | Abcf2         | 1500011B03Rik |
| <b>R18</b> | chr16:91712003-91712125 | Cebpz         | Bcl2a1c       | Ap2s1         | 4930426L09Rik |
| <b>R19</b> | Cops7b                  | Cldn9         | Chrna6        | Ccl9          | Bbs5          |
| <b>R20</b> | Cblc                    | Cbfa2t3       | Blmh          | Ap2s1         | Abcf2         |
| <b>R21</b> | Cebpz                   | Cd48          | Cadm4         | Acvr1b        | 4833413E03Rik |
| <b>R22</b> | Arpp21                  | Alpk1         | 9130019O22Rik | 5430411C19Rik | 1500011B03Rik |
| <b>R23</b> | Ccdc108                 | Blmh          | Alox12e       | Akap10        | 9130019O22Rik |
| <b>R24</b> | Alkbh6                  | 4930583I09Rik | 4833413E03Rik | 1700080E11Rik | 1500011B03Rik |
| <b>R25</b> | Alpk1                   | Akap10        | Abcf2         | 4930583I09Rik | 4930426L09Rik |
| <b>R26</b> | Bbs5                    | Apom          | Akap10        | Acbd6         | 4833413E03Rik |
| <b>R27</b> | Acvr1b                  | 9230110C19Rik | 4930583I09Rik | 4833413E03Rik | 1700080E11Rik |
| <b>R28</b> | Ccdc108                 | Ap2s1         | Alox12e       | Aldoc         | 2900060B14Rik |
| <b>R29</b> | Ccl9                    | Ccl3          | Cadm4         | Bbs5          | Alox12e       |
| <b>R30</b> | Dock8                   | Cops7b        | Ccr11         | App           | 9230110C19Rik |
