# Supplementary material for: Three-way interaction model to trace the mechanisms involved in Alzheimer’s disease transgenic mice
Source: PubMed Central journal article supplement (PMC5608283; doi:10.1371/journal.pone.0184697), 2017-09-21
Supplement: pone.0184697.s004.pdf [file pone.0184697.s004.pdf]

## S4 Tables

Table 1. Gene set enrichment analysis results based on biological process

| Biological Process Enrichment Analysis for X3        |                                                   |                        |          |          |
|------------------------------------------------------|---------------------------------------------------|------------------------|----------|----------|
| GOID                                                 | GO Term                                           | GO Levels              | p-value  | FDR (BH) |
| GO:0000165                                           | MAPK cascade                                      | [4, 5, 6, 8, 9]        | 5.66E-06 | 1.32E-05 |
| GO:0001816                                           | cytokine production                               | [3]                    | 1.65E-05 | 3.36E-05 |
| GO:0001818                                           | negative regulation of cytokine production        | [3, 4, 5]              | 1.06E-04 | 1.44E-04 |
| GO:0001819                                           | positive regulation of cytokine production        | [3, 4, 5]              | 0.001171 | 0.001247 |
| GO:0002221                                           | pattern recognition receptor signaling pathway    | [5, 7, 8, 9, 10]       | 3.48E-04 | 4.26E-04 |
| GO:0002274                                           | myeloid leukocyte activation                      | [3, 5]                 | 2.67E-06 | 8.19E-06 |
| GO:0002285                                           | lymphocyte activation involved in immune response | [3, 4, 5, 6]           | 6.11E-08 | 3.74E-07 |
| GO:0002286                                           | T cell activation involved in immune response     | [3, 4, 5, 6, 7, 9, 10] | 1.84E-04 | 2.31E-04 |
| GO:0002366                                           | leukocyte activation involved in immune response  | [3, 4, 5]              | 4.90E-10 | 1.20E-08 |
| GO:0002367                                           | cytokine production involved in immune response   | [3, 4]                 | 9.60E-05 | 1.34E-04 |
| GO:0002521                                           | leukocyte differentiation                         | [5, 6, 7, 8]           | 6.08E-04 | 6.77E-04 |
| GO:0002577                                           | regulation of antigen processing and presentation | [3, 4]                 | 2.80E-06 | 8.06E-06 |
| GO:0002682                                           | regulation of immune system process               | [2, 3]                 | 4.54E-08 | 3.71E-07 |
| GO:0002683                                           | negative regulation of immune system process      | [2, 3, 4]              | 1.22E-05 | 2.59E-05 |
| GO:0002684                                           | positive regulation of immune system process      | [2, 3, 4]              | 6.67E-08 | 3.63E-07 |
| GO:0002757                                           | immune response-activating signal transduction    | [3, 5, 6, 7]           | 2.30E-05 | 4.34E-05 |
| GO:0006935                                           | chemotaxis                                        | [3, 4]                 | 5.44E-04 | 6.20E-04 |
| GO:0006954                                           | inflammatory response                             | [4]                    | 1.76E-05 | 3.45E-05 |
| GO:0007159                                           | leukocyte cell-cell adhesion                      | [4, 5]                 | 2.69E-07 | 1.10E-06 |
| GO:0009620                                           | response to fungus                                | [3, 5]                 | 2.53E-05 | 4.43E-05 |
| GO:0019221                                           | cytokine-mediated signaling pathway               | [5, 6]                 | 0.001158 | 0.001261 |
| GO:0030099                                           | myeloid cell differentiation                      | [5, 6, 7, 8]           | 0.001209 | 0.00126  |
| GO:0030593                                           | neutrophil chemotaxis                             | [5, 6, 7, 8, 9, 10]    | 4.17E-06 | 1.07E-05 |
| GO:0031349                                           | positive regulation of defense response           | [3, 4, 5, 6]           | 2.44E-05 | 4.42E-05 |
| GO:0032623                                           | interleukin-2 production                          | [4]                    | 9.39E-07 | 3.29E-06 |
| GO:0032649                                           | regulation of interferon-gamma production         | [4, 5]                 | 7.24E-06 | 1.61E-05 |
| GO:0033993                                           | response to lipid                                 | [4]                    | 3.13E-06 | 8.53E-06 |
| GO:0034097                                           | response to cytokine                              | [4]                    | 3.07E-05 | 5.01E-05 |
| GO:0034341                                           | response to interferon-gamma                      | [4, 5]                 | 4.38E-06 | 1.07E-05 |
| GO:0042098                                           | T cell proliferation                              | [5, 6, 7, 9, 10]       | 9.53E-05 | 1.37E-04 |
| GO:0042110                                           | T cell activation                                 | [4, 6, 8, 9]           | 2.85E-05 | 4.82E-05 |
| GO:0042113                                           | B cell activation                                 | [4, 6]                 | 3.50E-04 | 4.18E-04 |
| GO:0045087                                           | innate immune response                            | [3, 4]                 | 6.70E-09 | 8.20E-08 |
| GO:0045321                                           | leukocyte activation                              | [2, 4]                 | 3.42E-10 | 1.68E-08 |
| GO:0046649                                           | lymphocyte activation                             | [3, 5]                 | 2.14E-07 | 9.53E-07 |
| GO:0046651                                           | lymphocyte proliferation                          | [4, 5, 6]              | 1.13E-07 | 5.54E-07 |
| GO:0046916                                           | cellular transition metal ion homeostasis         | [8, 9]                 | 1.54E-04 | 1.98E-04 |
| GO:0050663                                           | cytokine secretion                                | [4, 5, 6, 7, 8]        | 5.86E-05 | 8.70E-05 |
| GO:0050670                                           | regulation of lymphocyte proliferation            | [5, 6, 7]              | 1.33E-04 | 1.76E-04 |
| GO:0050727                                           | regulation of inflammatory response               | [4, 5, 6]              | 0.003642 | 0.003642 |
| GO:0050778                                           | positive regulation of immune response            | [3, 4, 5]              | 3.83E-05 | 5.86E-05 |
| GO:0050829                                           | defense response to Gram-negative bacterium       | [5, 6, 7]              | 3.51E-07 | 1.32E-06 |
| GO:0050848                                           | regulation of calcium-mediated signaling          | [5, 6, 7, 8]           | 3.08E-05 | 4.87E-05 |
| GO:0050900                                           | leukocyte migration                               | [2, 4, 5, 6]           | 1.45E-06 | 4.74E-06 |
| GO:0051017                                           | actin filament bundle assembly                    | [4, 7, 8]              | 4.41E-04 | 5.14E-04 |
| GO:0051402                                           | neuron apoptotic process                          | [5, 7]                 | 0.003233 | 0.003301 |
| GO:0051707                                           | response to other organism                        | [2, 4]                 | 4.64E-08 | 3.25E-07 |
| GO:0070372                                           | regulation of ERK1 and ERK2 cascade               | [6, 7, 8, 9, 10, 11]   | 2.61E-08 | 2.56E-07 |
| GO:0071216                                           | cellular response to biotic stimulus              | [3]                    | 4.64E-09 | 7.58E-08 |
| GO:0071222                                           | cellular response to lipopolysaccharide           | [5, 6, 8]              | 6.11E-08 | 3.74E-07 |
| Biological Process Enrichment Analysis for X1,X2, X3 |                                                   |                        |          |          |
| GOID                                                 | GO Term                                           | GO Levels              | p-value  | FDR (BH) |
| GO:0001775                                           | cell activation                                   | [3]                    | 1.37E-04 | 0.005283 |
| GO:0001779                                           | natural killer cell differentiation               | [5, 7, 8, 9, 10]       | 0.001744 | 0.018312 |
| GO:0001816                                           | cytokine production                               | [3]                    | 7.46E-04 | 0.012309 |

## S4 Tables

Table 1. Gene set enrichment analysis results based on biological process

|            |                                                          |                         |          |          |
|------------|----------------------------------------------------------|-------------------------|----------|----------|
| GO:0001817 | regulation of cytokine production                        | [3, 4]                  | 0.001893 | 0.01822  |
| GO:0001818 | negative regulation of cytokine production               | [3, 4, 5]               | 0.007768 | 0.039438 |
| GO:0001819 | positive regulation of cytokine production               | [3, 4, 5]               | 0.006784 | 0.03731  |
| GO:0001942 | hair follicle development                                | [3, 5, 6, 7, 8]         | 0.001774 | 0.017819 |
| GO:0002221 | pattern recognition receptor signaling pathway           | [5, 7, 8, 9, 10]        | 0.003121 | 0.02444  |
| GO:0002274 | myeloid leukocyte activation                             | [3, 5]                  | 8.41E-04 | 0.012529 |
| GO:0002285 | lymphocyte activation involved in immune response        | [3, 4, 5, 6]            | 5.50E-04 | 0.011545 |
| GO:0002286 | T cell activation involved in immune response            | [3, 4, 5, 6, 7, 9, 10]  | 0.037126 | 0.097456 |
| GO:0002312 | B cell activation involved in immune response            | [3, 4, 5, 6, 7]         | 0.015155 | 0.059845 |
| GO:0002366 | leukocyte activation involved in immune response         | [3, 4, 5]               | 3.51E-05 | 0.004053 |
| GO:0002367 | cytokine production involved in immune response          | [3, 4]                  | 0.021015 | 0.071917 |
| GO:0002444 | myeloid leukocyte mediated immunity                      | [4]                     | 0.026131 | 0.082687 |
| GO:0002520 | immune system development                                | [2, 4, 5]               | 0.001934 | 0.017872 |
| GO:0002521 | leukocyte differentiation                                | [5, 6, 7, 8]            | 0.004144 | 0.028156 |
| GO:0002548 | monocyte chemotaxis                                      | [4, 6, 7, 8]            | 7.02E-04 | 0.012472 |
| GO:0002573 | myeloid leukocyte differentiation                        | [6, 7, 8, 9]            | 0.036275 | 0.096873 |
| GO:0002577 | regulation of antigen processing and presentation        | [3, 4]                  | 3.65E-05 | 0.003373 |
| GO:0002643 | regulation of tolerance induction                        | [3, 4, 5, 6, 7]         | 3.45E-04 | 0.008868 |
| GO:0002682 | regulation of immune system process                      | [2, 3]                  | 1.13E-05 | 0.0052   |
| GO:0002683 | negative regulation of immune system process             | [2, 3, 4]               | 0.003465 | 0.025823 |
| GO:0002684 | positive regulation of immune system process             | [2, 3, 4]               | 1.44E-04 | 0.005134 |
| GO:0002690 | positive regulation of leukocyte chemotaxis              | [4, 5, 6, 7, 8, 9]      | 0.027974 | 0.084472 |
| GO:0002697 | regulation of immune effector process                    | [3, 4]                  | 0.030833 | 0.088478 |
| GO:0002757 | immune response-activating signal transduction           | [3, 5, 6, 7]            | 7.35E-04 | 0.012583 |
| GO:0002763 | positive regulation of myeloid leukocyte differentiation | [5, 6, 7, 8, 9, 10, 11] | 0.010914 | 0.049432 |
| GO:0002831 | regulation of response to biotic stimulus                | [3, 4]                  | 0.002634 | 0.021728 |
| GO:0002833 | positive regulation of response to biotic stimulus       | [3, 4, 5]               | 0.005472 | 0.03283  |
| GO:0006066 | alcohol metabolic process                                | [4]                     | 0.027144 | 0.083604 |
| GO:0006468 | protein phosphorylation                                  | [6, 7]                  | 0.035933 | 0.096519 |
| GO:0006690 | icosanoid metabolic process                              | [4, 6, 7]               | 0.014673 | 0.058948 |
| GO:0006810 | transport                                                | [3]                     | 0.033409 | 0.092425 |
| GO:0006811 | ion transport                                            | [4, 5]                  | 0.035011 | 0.09571  |
| GO:0006820 | anion transport                                          | [5, 6]                  | 0.014241 | 0.058746 |
| GO:0006909 | phagocytosis                                             | [4, 5, 6]               | 0.017691 | 0.065386 |
| GO:0006952 | defense response                                         | [3]                     | 2.15E-04 | 0.006197 |
| GO:0006954 | inflammatory response                                    | [4]                     | 0.002275 | 0.020209 |
| GO:0007166 | cell surface receptor signaling pathway                  | [4, 5]                  | 0.010048 | 0.046423 |
| GO:0007586 | digestion                                                | [3]                     | 0.004409 | 0.029524 |
| GO:0008203 | cholesterol metabolic process                            | [6]                     | 0.019857 | 0.070031 |
| GO:0008285 | negative regulation of cell proliferation                | [3, 4, 5]               | 0.015026 | 0.059844 |
| GO:0008347 | glial cell migration                                     | [4, 5, 6, 7, 8]         | 0.004777 | 0.03065  |
| GO:0008637 | apoptotic mitochondrial changes                          | [5, 6]                  | 0.014673 | 0.058948 |
| GO:0009119 | ribonucleoside metabolic process                         | [5, 6, 7]               | 0.008653 | 0.042081 |
| GO:0009166 | nucleotide catabolic process                             | [5, 6, 7, 8]            | 0.005751 | 0.03363  |
| GO:0009611 | response to wounding                                     | [3]                     | 0.015874 | 0.061116 |
| GO:0009617 | response to bacterium                                    | [3, 5]                  | 6.95E-04 | 0.012848 |
| GO:0009620 | response to fungus                                       | [3, 5]                  | 0.006225 | 0.03595  |
| GO:0009893 | positive regulation of metabolic process                 | [2, 3, 4]               | 0.008366 | 0.041561 |
| GO:0009966 | regulation of signal transduction                        | [3, 4, 5]               | 0.025154 | 0.080146 |
| GO:0010604 | positive regulation of macromolecule metabolic process   | [3, 4, 5]               | 0.008599 | 0.042264 |
| GO:0010647 | positive regulation of cell communication                | [3, 4, 5]               | 0.032778 | 0.091779 |
| GO:0010876 | lipid localization                                       | [3]                     | 0.016054 | 0.061298 |
| GO:0012501 | programmed cell death                                    | [4]                     | 0.003271 | 0.024772 |
| GO:0015696 | ammonium transport                                       | [5, 7, 8]               | 0.026131 | 0.082687 |
| GO:0015844 | monoamine transport                                      | [4, 5]                  | 0.022651 | 0.075286 |
| GO:0015914 | phospholipid transport                                   | [5, 6, 7, 8]            | 0.009849 | 0.045964 |
| GO:0016052 | carbohydrate catabolic process                           | [4]                     | 0.007112 | 0.038204 |

## S4 Tables

Table 1. Gene set enrichment analysis results based on biological process

|            |                                                                      |                          |          |          |
|------------|----------------------------------------------------------------------|--------------------------|----------|----------|
| GO:0016310 | phosphorylation                                                      | [5]                      | 0.038464 | 0.099277 |
| GO:0019220 | regulation of phosphate metabolic process                            | [5, 6]                   | 0.026869 | 0.083312 |
| GO:0019221 | cytokine-mediated signaling pathway                                  | [5, 6]                   | 0.00666  | 0.037074 |
| GO:0019932 | second-messenger-mediated signaling                                  | [5, 6]                   | 0.033636 | 0.0925   |
| GO:0023014 | signal transduction by protein phosphorylation                       | [3, 4, 5, 7, 8]          | 0.013415 | 0.057384 |
| GO:0023056 | positive regulation of signaling                                     | [2, 3, 4]                | 0.029033 | 0.085433 |
| GO:0030099 | myeloid cell differentiation                                         | [5, 6, 7, 8]             | 0.007164 | 0.038041 |
| GO:0030193 | regulation of blood coagulation                                      | [4, 5, 6, 7]             | 0.026131 | 0.082687 |
| GO:0030593 | neutrophil chemotaxis                                                | [5, 6, 7, 8, 9, 10]      | 1.08E-04 | 0.004529 |
| GO:0030595 | leukocyte chemotaxis                                                 | [3, 5, 6, 7]             | 0.00116  | 0.014881 |
| GO:0031325 | positive regulation of cellular metabolic process                    | [3, 4, 5]                | 0.001457 | 0.016422 |
| GO:0031331 | positive regulation of cellular catabolic process                    | [4, 5, 6]                | 0.026363 | 0.082856 |
| GO:0031347 | regulation of defense response                                       | [4, 5]                   | 9.20E-04 | 0.012143 |
| GO:0031349 | positive regulation of defense response                              | [3, 4, 5, 6]             | 8.01E-04 | 0.012759 |
| GO:0031401 | positive regulation of protein modification process                  | [5, 6, 7, 8]             | 0.013471 | 0.057097 |
| GO:0031532 | actin cytoskeleton reorganization                                    | [5, 6]                   | 0.005751 | 0.03363  |
| GO:0031663 | lipopolysaccharide-mediated signaling pathway                        | [5, 6, 7, 9]             | 7.24E-05 | 0.003715 |
| GO:0032101 | regulation of response to external stimulus                          | [3, 4]                   | 0.001764 | 0.018112 |
| GO:0032103 | positive regulation of response to external stimulus                 | [3, 4, 5]                | 0.003147 | 0.024231 |
| GO:0032270 | positive regulation of cellular protein metabolic process            | [4, 5, 6, 7]             | 0.002528 | 0.021237 |
| GO:0032496 | response to lipopolysaccharide                                       | [4, 5, 7]                | 0.001222 | 0.015257 |
| GO:0032609 | interferon-gamma production                                          | [4]                      | 5.87E-05 | 0.003873 |
| GO:0032623 | interleukin-2 production                                             | [4]                      | 0.001484 | 0.016328 |
| GO:0032660 | regulation of interleukin-17 production                              | [4, 5]                   | 2.45E-05 | 0.003769 |
| GO:0032689 | negative regulation of interferon-gamma production                   | [4, 5, 6]                | 0.001411 | 0.016294 |
| GO:0032729 | positive regulation of interferon-gamma production                   | [4, 5, 6]                | 0.002736 | 0.02218  |
| GO:0032735 | positive regulation of interleukin-12 production                     | [4, 5, 6]                | 0.00233  | 0.020314 |
| GO:0033238 | regulation of cellular amine metabolic process                       | [4, 5, 6]                | 0.004139 | 0.028537 |
| GO:0033559 | unsaturated fatty acid metabolic process                             | [5, 6, 8, 9]             | 0.018741 | 0.067117 |
| GO:0034097 | response to cytokine                                                 | [4]                      | 0.011598 | 0.051524 |
| GO:0034341 | response to interferon-gamma                                         | [4, 5]                   | 9.14E-04 | 0.012414 |
| GO:0035987 | endodermal cell differentiation                                      | [5, 6, 7, 8, 9]          | 0.006624 | 0.037322 |
| GO:0042063 | gliogenesis                                                          | [6, 7]                   | 0.030311 | 0.088074 |
| GO:0042098 | T cell proliferation                                                 | [5, 6, 7, 9, 10]         | 0.006814 | 0.037036 |
| GO:0042110 | T cell activation                                                    | [4, 6, 8, 9]             | 0.024641 | 0.079055 |
| GO:0042325 | regulation of phosphorylation                                        | [6, 7]                   | 0.013823 | 0.057535 |
| GO:0042742 | defense response to bacterium                                        | [4, 5, 6]                | 0.005433 | 0.033029 |
| GO:0042981 | regulation of apoptotic process                                      | [5, 6]                   | 0.013521 | 0.056787 |
| GO:0043065 | positive regulation of apoptotic process                             | [5, 6, 7]                | 0.033073 | 0.092047 |
| GO:0043066 | negative regulation of apoptotic process                             | [5, 6, 7]                | 0.005061 | 0.031594 |
| GO:0043085 | positive regulation of catalytic activity                            | [3, 4, 5]                | 0.030942 | 0.087701 |
| GO:0043409 | negative regulation of MAPK cascade                                  | [5, 6, 7, 8, 9, 10, 11]  | 0.035716 | 0.096497 |
| GO:0043410 | positive regulation of MAPK cascade                                  | [5, 6, 7, 8, 9, 10, 11]  | 0.027337 | 0.08364  |
| GO:0043467 | regulation of generation of precursor metabolites and energy         | [4, 5]                   | 0.01045  | 0.047799 |
| GO:0043491 | protein kinase B signaling                                           | [5, 6]                   | 0.021304 | 0.07237  |
| GO:0043900 | regulation of multi-organism process                                 | [2, 3]                   | 5.22E-04 | 0.01148  |
| GO:0043902 | positive regulation of multi-organism process                        | [2, 3, 4]                | 0.004409 | 0.029524 |
| GO:0044765 | single-organism transport                                            | [3, 4]                   | 0.030207 | 0.088326 |
| GO:0045087 | innate immune response                                               | [3, 4]                   | 1.90E-05 | 0.004392 |
| GO:0045321 | leukocyte activation                                                 | [2, 4]                   | 1.52E-04 | 0.005026 |
| GO:0045576 | mast cell activation                                                 | [4, 6]                   | 0.001805 | 0.017745 |
| GO:0045637 | regulation of myeloid cell differentiation                           | [4, 5, 6, 7, 8, 9]       | 0.006457 | 0.036831 |
| GO:0045937 | positive regulation of phosphate metabolic process                   | [5, 6, 7]                | 0.013102 | 0.05657  |
| GO:0045944 | positive regulation of transcription from RNA polymerase II promoter | [6, 7, 8, 9, 10, 11, 12] | 0.037344 | 0.097473 |
| GO:0046434 | organophosphate catabolic process                                    | [4, 5]                   | 0.01207  | 0.053108 |
| GO:0046496 | nicotinamide nucleotide metabolic process                            | [6, 7, 8, 9]             | 0.007575 | 0.038885 |
| GO:0046649 | lymphocyte activation                                                | [3, 5]                   | 0.003938 | 0.02799  |

## S4 Tables

Table 1. Gene set enrichment analysis results based on biological process

|            |                                                               |                      |          |          |
|------------|---------------------------------------------------------------|----------------------|----------|----------|
| GO:0046651 | lymphocyte proliferation                                      | [4, 5, 6]            | 8.84E-05 | 0.004083 |
| GO:0046847 | filopodium assembly                                           | [5]                  | 0.007913 | 0.039737 |
| GO:0048245 | eosinophil chemotaxis                                         | [5, 6, 7, 8, 9, 10]  | 4.87E-04 | 0.011255 |
| GO:0048247 | lymphocyte chemotaxis                                         | [4, 6, 7, 8]         | 0.005117 | 0.03152  |
| GO:0048469 | cell maturation                                               | [4, 5, 6]            | 0.018994 | 0.067501 |
| GO:0048518 | positive regulation of biological process                     | [1, 2, 3]            | 0.007425 | 0.038982 |
| GO:0048522 | positive regulation of cellular process                       | [2, 3, 4]            | 0.011539 | 0.051757 |
| GO:0048583 | regulation of response to stimulus                            | [2, 3]               | 0.001281 | 0.015173 |
| GO:0048584 | positive regulation of response to stimulus                   | [2, 3, 4]            | 1.71E-04 | 0.00527  |
| GO:0050663 | cytokine secretion                                            | [4, 5, 6, 7, 8]      | 0.015268 | 0.059778 |
| GO:0050691 | regulation of defense response to virus by host               | [4, 5, 6, 7, 8]      | 0.022828 | 0.075334 |
| GO:0050727 | regulation of inflammatory response                           | [4, 5, 6]            | 0.00871  | 0.041485 |
| GO:0050730 | regulation of peptidyl-tyrosine phosphorylation               | [7, 8, 9, 10]        | 0.014653 | 0.059382 |
| GO:0050776 | regulation of immune response                                 | [3, 4]               | 0.004075 | 0.028524 |
| GO:0050829 | defense response to Gram-negative bacterium                   | [5, 6, 7]            | 5.91E-04 | 0.01138  |
| GO:0050848 | regulation of calcium-mediated signaling                      | [5, 6, 7, 8]         | 0.007468 | 0.038767 |
| GO:0050851 | antigen receptor-mediated signaling pathway                   | [5, 7, 8, 9]         | 0.028127 | 0.083836 |
| GO:0050865 | regulation of cell activation                                 | [3, 4]               | 0.038415 | 0.099707 |
| GO:0050900 | leukocyte migration                                           | [2, 4, 5, 6]         | 8.71E-04 | 0.012578 |
| GO:0051017 | actin filament bundle assembly                                | [4, 7, 8]            | 0.020431 | 0.070441 |
| GO:0051241 | negative regulation of multicellular organismal process       | [2, 3, 4]            | 0.022296 | 0.074642 |
| GO:0051246 | regulation of protein metabolic process                       | [4, 5]               | 0.018171 | 0.066627 |
| GO:0051247 | positive regulation of protein metabolic process              | [4, 5, 6]            | 0.001595 | 0.017133 |
| GO:0051272 | positive regulation of cellular component movement            | [3, 4, 5]            | 0.035188 | 0.095629 |
| GO:0051707 | response to other organism                                    | [2, 4]               | 3.32E-04 | 0.009011 |
| GO:0055076 | transition metal ion homeostasis                              | [8]                  | 8.36E-04 | 0.01287  |
| GO:0055085 | transmembrane transport                                       | [3, 4, 5]            | 0.018468 | 0.067182 |
| GO:0055086 | nucleobase-containing small molecule metabolic process        | [3, 4, 5]            | 0.027476 | 0.083513 |
| GO:0055114 | oxidation-reduction process                                   | [3]                  | 0.015304 | 0.059415 |
| GO:0061097 | regulation of protein tyrosine kinase activity                | [7, 8, 9, 10, 11]    | 0.016518 | 0.062043 |
| GO:0070098 | chemokine-mediated signaling pathway                          | [6, 7]               | 3.84E-04 | 0.009342 |
| GO:0070232 | regulation of T cell apoptotic process                        | [8, 9, 10]           | 0.004451 | 0.029373 |
| GO:0070301 | cellular response to hydrogen peroxide                        | [5, 6]               | 0.002892 | 0.023037 |
| GO:0070372 | regulation of ERK1 and ERK2 cascade                           | [6, 7, 8, 9, 10, 11] | 6.61E-05 | 0.003817 |
| GO:0070887 | cellular response to chemical stimulus                        | [3]                  | 0.001906 | 0.017974 |
| GO:0071216 | cellular response to biotic stimulus                          | [3]                  | 4.79E-05 | 0.003689 |
| GO:0071310 | cellular response to organic substance                        | [4]                  | 0.023844 | 0.078127 |
| GO:0071346 | cellular response to interferon-gamma                         | [5, 6]               | 0.0145   | 0.059281 |
| GO:0071347 | cellular response to interleukin-1                            | [6]                  | 0.005024 | 0.031796 |
| GO:0071356 | cellular response to tumor necrosis factor                    | [6]                  | 0.036535 | 0.097008 |
| GO:0071396 | cellular response to lipid                                    | [5]                  | 0.020389 | 0.071362 |
| GO:0071560 | cellular response to transforming growth factor beta stimulus | [4, 6]               | 0.030513 | 0.088107 |
| GO:0071702 | organic substance transport                                   | [4]                  | 0.017614 | 0.065625 |
| GO:0080134 | regulation of response to stress                              | [3, 4]               | 0.020413 | 0.070909 |
| GO:0097028 | dendritic cell differentiation                                | [6, 7, 8, 9]         | 0.00384  | 0.027723 |
| GO:0097190 | apoptotic signaling pathway                                   | [4, 5, 6]            | 0.016143 | 0.06113  |
| GO:0097191 | extrinsic apoptotic signaling pathway                         | [5, 6, 7]            | 0.002517 | 0.021538 |
| GO:0097529 | myeloid leukocyte migration                                   | [3, 5, 6, 7]         | 5.72E-04 | 0.011496 |
| GO:0098542 | defense response to other organism                            | [3, 4, 5]            | 0.003838 | 0.028143 |
| GO:0098581 | detection of external biotic stimulus                         | [4]                  | 8.72E-04 | 0.012211 |
| GO:0098609 | cell-cell adhesion                                            | [3]                  | 0.027978 | 0.083933 |
| GO:1901136 | carbohydrate derivative catabolic process                     | [4]                  | 0.02409  | 0.078376 |
| GO:1901565 | organonitrogen compound catabolic process                     | [4]                  | 0.012114 | 0.052799 |
| GO:1901615 | organic hydroxy compound metabolic process                    | [3]                  | 0.037101 | 0.097946 |
| GO:1901700 | response to oxygen-containing compound                        | [3]                  | 0.026724 | 0.083421 |
| GO:1901701 | cellular response to oxygen-containing compound               | [4]                  | 0.009064 | 0.042731 |
| GO:1902105 | regulation of leukocyte differentiation                       | [4, 5, 6, 7, 8, 9]   | 0.028788 | 0.085256 |

S4 Tables

**Table 1. Gene set enrichment analysis results based on biological process**

|            |                                                              |                        |          |          |
|------------|--------------------------------------------------------------|------------------------|----------|----------|
| GO:1902106 | negative regulation of leukocyte differentiation             | [4, 5, 6, 7, 8, 9, 10] | 0.03087  | 0.088036 |
| GO:1902532 | negative regulation of intracellular signal transduction     | [4, 5, 6, 7]           | 0.018476 | 0.066687 |
| GO:1902533 | positive regulation of intracellular signal transduction     | [4, 5, 6, 7]           | 0.021672 | 0.073084 |
| GO:1903034 | regulation of response to wounding                           | [4, 5]                 | 0.008698 | 0.041861 |
| GO:1903036 | positive regulation of response to wounding                  | [3, 4, 5, 6]           | 0.031786 | 0.089543 |
| GO:1903706 | regulation of hemopoiesis                                    | [3, 4, 5, 6, 7, 8]     | 0.004632 | 0.030138 |
| GO:1903708 | positive regulation of hemopoiesis                           | [3, 4, 5, 6, 7, 8, 9]  | 0.006814 | 0.037036 |
| GO:2001233 | regulation of apoptotic signaling pathway                    | [4, 5, 6, 7]           | 0.005579 | 0.033047 |
| GO:2001234 | negative regulation of apoptotic signaling pathway           | [4, 5, 6, 7, 8]        | 0.001237 | 0.015034 |
| GO:2001235 | positive regulation of apoptotic signaling pathway           | [4, 5, 6, 7, 8]        | 0.024311 | 0.078542 |
| GO:2001237 | negative regulation of extrinsic apoptotic signaling pathway | [5, 6, 7, 8, 9]        | 0.002131 | 0.019301 |

## S4 Tables

Table 2. Gene set enrichment analysis results based on cellular component.

| Cellular Component Enrichment Analysis for X3       |                                  |                           |           |          |
|-----------------------------------------------------|----------------------------------|---------------------------|-----------|----------|
| GOID                                                | GO Term                          | GO Levels                 | p - value | FDR (BH) |
| GO:0005764                                          | lysosome                         | [6, 7, 8, 9]              | 2.05E-02  | 3.33E-02 |
| GO:0005886                                          | plasma membrane                  | [2, 3, 4]                 | 6.56E-04  | 4.26E-03 |
| GO:0005925                                          | focal adhesion                   | [4, 5]                    | 1.44E-02  | 2.68E-02 |
| GO:0009986                                          | cell surface                     | [2, 3]                    | 1.07E-03  | 4.65E-03 |
| GO:0016021                                          | integral component of membrane   | [3, 4]                    | 1.73E-03  | 5.63E-03 |
| GO:0044459                                          | plasma membrane part             | [2, 3, 4, 5]              | 4.94E-02  | 7.13E-02 |
| GO:0045121                                          | membrane raft                    | [4, 5]                    | 6.15E-04  | 7.99E-03 |
| GO:0098552                                          | side of membrane                 | [2, 3]                    | 4.52E-03  | 1.18E-02 |
| GO:0098589                                          | membrane region                  | [2, 3]                    | 4.94E-03  | 1.07E-02 |
| Cellular Component Enrichment Analysis for X1,X2,X3 |                                  |                           |           |          |
| GOID                                                | GO Term                          | GO Levels                 | p - value | FDR (BH) |
| GO:0005764                                          | lysosome                         | [6, 7, 8, 9]              | 1.29E-02  | 9.74E-02 |
| GO:0005905                                          | coated pit                       | [2, 3, 4]                 | 1.59E-02  | 9.83E-02 |
| GO:0009897                                          | external side of plasma membrane | [3, 4, 5, 6]              | 1.05E-03  | 3.57E-02 |
| GO:0009986                                          | cell surface                     | [2, 3]                    | 6.53E-04  | 4.44E-02 |
| GO:0031224                                          | intrinsic component of membrane  | [2, 3]                    | 1.16E-02  | 9.83E-02 |
| GO:0036064                                          | ciliary basal body               | [3, 4, 5, 6, 7, 8, 9, 10] | 1.01E-02  | 9.85E-02 |
| GO:0044459                                          | plasma membrane part             | [2, 3, 4, 5]              | 1.80E-03  | 4.08E-02 |
| GO:0060170                                          | ciliary membrane                 | [3, 4, 5, 6, 7, 8]        | 1.33E-02  | 9.05E-02 |
| GO:0071944                                          | cell periphery                   | [2, 3]                    | 5.57E-03  | 6.32E-02 |
| GO:0098552                                          | side of membrane                 | [2, 3]                    | 3.70E-03  | 5.04E-02 |
| GO:0098589                                          | membrane region                  | [2, 3]                    | 2.00E-03  | 3.39E-02 |

#### S4 Tables

**Table 3. Gene set enrichment analysis results based on pathway**

| <b>Pathway Enrichment Analysis for X3</b>       |                                              |                  |                |
|-------------------------------------------------|----------------------------------------------|------------------|----------------|
| <b>GOID</b>                                     | <b>GOTerm</b>                                | <b>p - value</b> | <b>FDR(BH)</b> |
| KEGG:04060                                      | Cytokine-cytokine receptor interaction       | 1.81E-02         | 2.02E-02       |
| KEGG:04145                                      | Phagosome                                    | 5.48E-04         | 1.74E-03       |
| KEGG:04514                                      | Cell adhesion molecules (CAMs)               | 4.70E-03         | 8.11E-03       |
| KEGG:04620                                      | Toll-like receptor signaling pathway         | 1.19E-03         | 2.83E-03       |
| KEGG:05140                                      | Leishmaniasis                                | 3.26E-04         | 1.24E-03       |
| KEGG:05152                                      | Tuberculosis                                 | 5.83E-03         | 8.52E-03       |
| KEGG:05323                                      | Rheumatoid arthritis                         | 3.09E-05         | 5.88E-04       |
| <b>Pathway Enrichment Analysis for X1,X2,X3</b> |                                              |                  |                |
| <b>GOID</b>                                     | <b>GOTerm</b>                                | <b>p - value</b> | <b>FDR(BH)</b> |
| KEGG:04060                                      | Cytokine-cytokine receptor interaction       | 4.66E-03         | 6.81E-02       |
| KEGG:04380                                      | Osteoclast differentiation                   | 3.35E-03         | 7.83E-02       |
| KEGG:04672                                      | Intestinal immune network for IgA production | 9.17E-03         | 8.94E-02       |
| KEGG:04726                                      | Serotonergic synapse                         | 4.38E-03         | 7.32E-02       |
| KEGG:04978                                      | Mineral absorption                           | 1.18E-02         | 9.88E-02       |
| KEGG:05140                                      | Leishmaniasis                                | 5.47E-03         | 7.12E-02       |
| KEGG:05145                                      | Toxoplasmosis                                | 9.08E-03         | 9.66E-02       |
| KEGG:05220                                      | Chronic myeloid leukemia                     | 8.28E-03         | 9.68E-02       |
| KEGG:05323                                      | Rheumatoid arthritis                         | 2.42E-03         | 7.08E-02       |
