# Supplementary material for: Three-way interaction model to trace the mechanisms involved in Alzheimer’s disease transgenic mice
Source: PubMed Central journal article supplement (PMC5608283; doi:10.1371/journal.pone.0184697), 2017-09-21
Supplement: pone.0184697.s005.pdf [file pone.0184697.s005.pdf]

**S5 Table:** The categorized biological processes based on the AD-related pathways

| <b>Alzheimer's disease-related pathways</b>      |                                                          |                 |
|--------------------------------------------------|----------------------------------------------------------|-----------------|
| <b>GO ID</b>                                     | <b>GO Term</b>                                           | <b>GO Level</b> |
| <b>Inflammation and Immune System Activation</b> |                                                          |                 |
| GO:0002763                                       | Positive regulation of myeloid leukocyte differentiation | 11              |
| GO:0001779                                       | Natural killer cell differentiation                      | 10              |
| GO:0002221                                       | Pattern recognition receptor signaling pathway           | 10              |
| GO:0002286                                       | T cell activation involved in immune response            | 10              |
| GO:0030593                                       | Neutrophil chemotaxis                                    | 10              |
| GO:0042098                                       | T cell proliferation                                     | 10              |
| GO:0048245                                       | Eosinophil chemotaxis                                    | 10              |
| GO:1902106                                       | Negative regulation of leukocyte differentiation         | 10              |
| GO:0002573                                       | Myeloid leukocyte differentiation                        | 9               |
| GO:0002690                                       | Positive regulation of leukocyte chemotaxis              | 9               |
| GO:0033559                                       | Unsaturated fatty acid metabolic process                 | 9               |
| GO:0042110                                       | T cell activation                                        | 9               |
| GO:0045637                                       | Regulation of myeloid cell differentiation               | 9               |
| GO:0050851                                       | Antigen receptor-mediated signaling pathway              | 9               |
| GO:0097028                                       | Dendritic cell differentiation                           | 9               |
| GO:1902105                                       | Regulation of leukocyte differentiation                  | 9               |
| GO:0002521                                       | Leukocyte differentiation                                | 8               |
| GO:0002548                                       | Monocyte chemotaxis                                      | 8               |
| GO:0030099                                       | Myeloid cell differentiation                             | 8               |
| GO:0048247                                       | Lymphocyte chemotaxis                                    | 8               |
| GO:0050663                                       | Cytokine secretion                                       | 8               |
| GO:0002312                                       | B cell activation involved in immune response            | 7               |
| GO:0002643                                       | Regulation of tolerance induction                        | 7               |
| GO:0002757                                       | Immune response-activating signal transduction           | 7               |
| GO:0030595                                       | Leukocyte chemotaxis                                     | 7               |
| GO:0070098                                       | Chemokine-mediated signaling pathway                     | 7               |
| GO:0097529                                       | Myeloid leukocyte migration                              | 7               |
| GO:0002285                                       | Lymphocyte activation involved in immune response        | 6               |
| GO:0006909                                       | Phagocytosis                                             | 6               |
| GO:0019221                                       | Cytokine-mediated signaling pathway                      | 6               |
| GO:0031349                                       | Positive regulation of defense response                  | 6               |
| GO:0032689                                       | Negative regulation of interferon-gamma production       | 6               |
| GO:0032729                                       | Positive regulation of interferon-gamma production       | 6               |
| GO:0032735                                       | Positive regulation of interleukin-12 production         | 6               |
| GO:0045576                                       | Mast cell activation                                     | 6               |
| GO:0046651                                       | Lymphocyte proliferation                                 | 6               |
| GO:0048469                                       | Cell maturation                                          | 6               |
| GO:0050727                                       | Regulation of inflammatory response                      | 6               |
| GO:0050900                                       | Leukocyte migration                                      | 6               |

**S5 Table:** The categorized biological processes based on the AD-related pathways

|                  |                                                               |    |
|------------------|---------------------------------------------------------------|----|
| GO:0071346       | Cellular response to interferon-gamma                         | 6  |
| GO:0071347       | Cellular response to interleukin-1                            | 6  |
| GO:0071356       | Cellular response to tumor necrosis factor                    | 6  |
| GO:0071560       | Cellular response to transforming growth factor beta stimulus | 6  |
| GO:0001818       | Negative regulation of cytokine production                    | 5  |
| GO:0001819       | Positive regulation of cytokine production                    | 5  |
| GO:0002274       | Myeloid leukocyte activation                                  | 5  |
| GO:0002366       | Leukocyte activation involved in immune response              | 5  |
| GO:0002520       | Immune system development                                     | 5  |
| GO:0008285       | Negative regulation of cell proliferation                     | 5  |
| GO:0031347       | Regulation of defense response                                | 5  |
| GO:0032660       | Regulation of interleukin-17 production                       | 5  |
| GO:0034341       | Response to interferon-gamma                                  | 5  |
| GO:0046649       | Lymphocyte activation                                         | 5  |
| GO:0001817       | Regulation of cytokine production                             | 4  |
| GO:0002367       | Cytokine production involved in immune response               | 4  |
| GO:0002444       | Myeloid leukocyte mediated immunity                           | 4  |
| GO:0002577       | Regulation of antigen processing and presentation             | 4  |
| GO:0002683       | Negative regulation of immune system process                  | 4  |
| GO:0002684       | Positive regulation of immune system process                  | 4  |
| GO:0002697       | Regulation of immune effector process                         | 4  |
| GO:0006954       | Inflammatory response                                         | 4  |
| GO:0032101       | Regulation of response to external stimulus                   | 4  |
| GO:0032609       | Interferon-gamma production                                   | 4  |
| GO:0032623       | Interleukin-2 production                                      | 4  |
| GO:0034097       | Response to cytokine                                          | 4  |
| GO:0045087       | Innate immune response                                        | 4  |
| GO:0045321       | Leukocyte activation                                          | 4  |
| GO:0050776       | Regulation of immune response                                 | 4  |
| GO:0080134       | Regulation of response to stress                              | 4  |
| GO:0001816       | Cytokine production                                           | 3  |
| GO:0002682       | Regulation of immune system process                           | 3  |
| GO:0006952       | Defense response                                              | 3  |
| <b>Apoptosis</b> |                                                               |    |
| GO:0043409       | Negative regulation of MAPK cascade                           | 11 |
| GO:0043410       | Positive regulation of MAPK cascade                           | 11 |
| GO:0070372       | Regulation of ERK1 and ERK2 cascade                           | 11 |
| GO:0070232       | Regulation of T cell apoptotic process                        | 10 |
| GO:0031663       | Lipopolysaccharide-mediated signaling pathway                 | 9  |
| GO:2001237       | Negative regulation of extrinsic apoptotic signaling pathway  | 9  |
| GO:2001234       | Negative regulation of apoptotic signaling pathway            | 8  |
| GO:2001235       | Positive regulation of apoptotic signaling pathway            | 8  |
| GO:0043065       | Positive regulation of apoptotic process                      | 7  |

**S5 Table:** The categorized biological processes based on the AD-related pathways

|                                           |                                                              |    |
|-------------------------------------------|--------------------------------------------------------------|----|
| GO:0043066                                | Negative regulation of apoptotic process                     | 7  |
| GO:0097191                                | Extrinsic apoptotic signaling pathway                        | 7  |
| GO:2001233                                | Regulation of apoptotic signaling pathway                    | 7  |
| GO:0008637                                | Apoptotic mitochondrial changes                              | 6  |
| GO:0042981                                | Regulation of apoptotic process                              | 6  |
| GO:0043491                                | Protein kinase B signaling                                   | 6  |
| GO:0097190                                | Apoptotic signaling pathway                                  | 6  |
| GO:0031325                                | Positive regulation of cellular metabolic process            | 5  |
| GO:0071396                                | Cellular response to lipid                                   | 5  |
| GO:0012501                                | Programmed cell death                                        | 4  |
| GO:0071310                                | Cellular response to organic substance                       | 4  |
| GO:1901701                                | Cellular response to oxygen-containing compound              | 4  |
| GO:0007586                                | Digestion                                                    | 3  |
| GO:1901700                                | Response to oxygen-containing compound                       | 3  |
| <b>Oxidative Stress</b>                   |                                                              |    |
| GO:0061097                                | Regulation of protein tyrosine kinase activity               | 11 |
| GO:0050730                                | Regulation of peptidyl-tyrosine phosphorylation              | 10 |
| GO:0046496                                | Nicotinamide nucleotide metabolic process                    | 9  |
| GO:0009166                                | Nucleotide catabolic process                                 | 8  |
| GO:0023014                                | Signal transduction by protein phosphorylation               | 8  |
| GO:0009119                                | Ribonucleoside metabolic process                             | 7  |
| GO:0006690                                | Icosanoid metabolic process                                  | 7  |
| GO:0031331                                | Positive regulation of cellular catabolic process            | 6  |
| GO:0033238                                | Regulation of cellular amine metabolic process               | 6  |
| GO:0070301                                | Cellular response to hydrogen peroxide                       | 6  |
| GO:0010604                                | Positive regulation of macromolecule metabolic process       | 5  |
| GO:0043085                                | Positive regulation of catalytic activity                    | 5  |
| GO:0043467                                | Regulation of generation of precursor metabolites and energy | 5  |
| GO:0046434                                | Organophosphate catabolic process                            | 5  |
| GO:0055086                                | Nucleobase-containing small molecule metabolic process       | 5  |
| GO:0009893                                | Positive regulation of metabolic process                     | 4  |
| GO:0016052                                | Carbohydrate catabolic process                               | 4  |
| GO:1901136                                | Carbohydrate derivative catabolic process                    | 4  |
| GO:1901565                                | Organonitrogen compound catabolic process                    | 4  |
| GO:0006066                                | Alcohol metabolic process                                    | 4  |
| GO:0055114                                | Oxidation-reduction process                                  | 3  |
| GO:1901615                                | Organic hydroxy compound metabolic process                   | 3  |
| <b>Microglia Activation and Migration</b> |                                                              |    |
| GO:0008347                                | Glial cell migration                                         | 8  |
| GO:0032496                                | Response to lipopolysaccharide                               | 7  |
| GO:0042063                                | Gliogenesis                                                  | 7  |
| GO:0002833                                | Positive regulation of response to biotic stimulus           | 5  |
| GO:0032103                                | Positive regulation of response to external stimulus         | 5  |

**S5 Table:** The categorized biological processes based on the AD-related pathways

|                                                                    |                                                          |   |
|--------------------------------------------------------------------|----------------------------------------------------------|---|
| GO:0051272                                                         | Positive regulation of cellular component movement       | 5 |
| GO:0002831                                                         | Regulation of response to biotic stimulus                | 4 |
| GO:0043902                                                         | Positive regulation of multi-organism process            | 4 |
| GO:0048584                                                         | Positive regulation of response to stimulus              | 4 |
| GO:0050865                                                         | Regulation of cell activation                            | 4 |
| GO:0051241                                                         | Negative regulation of multicellular organismal process  | 4 |
| GO:0048522                                                         | Positive regulation of cellular process                  | 4 |
| GO:0098581                                                         | Detection of external biotic stimulus                    | 4 |
| GO:0001775                                                         | Cell activation                                          | 3 |
| GO:0043900                                                         | Regulation of multi-organism process                     | 3 |
| GO:0048583                                                         | Regulation of response to stimulus                       | 3 |
| GO:0071216                                                         | Cellular response to biotic stimulus                     | 3 |
| GO:0098609                                                         | Cell-cell adhesion                                       | 3 |
| <b>Calcium Signaling Pathway</b>                                   |                                                          |   |
| GO:0050848                                                         | Regulation of calcium-mediated signaling                 | 8 |
| GO:1902532                                                         | Negative regulation of intracellular signal transduction | 7 |
| GO:1902533                                                         | Positive regulation of intracellular signal transduction | 7 |
| GO:0019932                                                         | Second-messenger-mediated signaling                      | 6 |
| GO:0007166                                                         | Cell surface receptor signaling pathway                  | 5 |
| GO:0009966                                                         | Regulation of signal transduction                        | 5 |
| GO:0010647                                                         | Positive regulation of cell communication                | 5 |
| GO:0055085                                                         | Transmembrane transport                                  | 5 |
| GO:0023056                                                         | Positive regulation of signaling                         | 4 |
| GO:0006810                                                         | Transport                                                | 3 |
| GO:0048518                                                         | Positive regulation of biological process                | 3 |
| <b>Apolipoprotein E and Phospholipid Transport Dysfunction [1]</b> |                                                          |   |
| GO:0015696                                                         | Ammonium transport                                       | 8 |
| GO:0015914                                                         | Phospholipid transport                                   | 8 |
| GO:0006820                                                         | Anion transport                                          | 6 |
| GO:0008203                                                         | Cholesterol metabolic process                            | 6 |
| GO:0006811                                                         | Ion transport                                            | 5 |
| GO:0015844                                                         | Monoamine transport                                      | 5 |
| GO:0044765                                                         | Single-organism transport                                | 4 |
| GO:0071702                                                         | Organic substance transport                              | 4 |
| GO:0010876                                                         | Lipid localization                                       | 3 |
| <b>Neurofibrillary Tangles Formation</b>                           |                                                          |   |
| GO:0031401                                                         | Positive regulation of protein modification process      | 8 |
| GO:0051017                                                         | Actin filament bundle assembly                           | 8 |
| GO:0006468                                                         | Protein phosphorylation                                  | 7 |
| GO:0042325                                                         | Regulation of phosphorylation                            | 7 |
| GO:0045937                                                         | Positive regulation of phosphate metabolic process       | 7 |
| GO:0019220                                                         | Regulation of phosphate metabolic process                | 6 |

**S5 Table:** The categorized biological processes based on the AD-related pathways

|                                                           |                                                                      |                 |
|-----------------------------------------------------------|----------------------------------------------------------------------|-----------------|
| GO:0031532                                                | Actin cytoskeleton reorganization                                    | 6               |
| GO:0071560                                                | Cellular response to transforming growth factor beta stimulus        | 6               |
| GO:0016310                                                | Phosphorylation                                                      | 5               |
| <b>DNA Damage</b>                                         |                                                                      |                 |
| GO:0045944                                                | Positive regulation of transcription from RNA polymerase II promoter | 12              |
| GO:1903036                                                | Positive regulation of response to wounding                          | 6               |
| GO:0002833                                                | Positive regulation of response to biotic stimulus                   | 5               |
| GO:1903034                                                | Regulation of response to wounding                                   | 5               |
| GO:0002831                                                | Regulation of response to biotic stimulus                            | 4               |
| GO:0009611                                                | Response to wounding                                                 | 3               |
| GO:0070887                                                | Cellular response to chemical stimulus                               | 3               |
| GO:0071216                                                | Cellular response to biotic stimulus                                 | 3               |
| <b>Hematopoiesis [2,3]</b>                                |                                                                      |                 |
| GO:1903708                                                | Positive regulation of hemopoiesis                                   | 9               |
| GO:0055076                                                | Transition metal ion homeostasis                                     | 8               |
| GO:1903706                                                | Regulation of hemopoiesis                                            | 8               |
| GO:0030193                                                | Regulation of blood coagulation                                      | 7               |
| <b>Protein Oxidation</b>                                  |                                                                      |                 |
| GO:0032270                                                | Positive regulation of cellular protein metabolic process            | 7               |
| GO:0051247                                                | Positive regulation of protein metabolic process                     | 6               |
| GO:0051246                                                | Regulation of protein metabolic process                              | 5               |
| <b>pathways with unclear Alzheimer's disease relation</b> |                                                                      |                 |
| <b>GO ID</b>                                              | <b>GO Term</b>                                                       | <b>GO Level</b> |
| GO:0035987                                                | Endodermal cell differentiation                                      | 9               |
| GO:0001942                                                | Hair follicle development                                            | 8               |
| GO:0050691                                                | Regulation of defense response to virus by host                      | 8               |
| GO:0050829                                                | Defense response to Gram-negative bacterium                          | 7               |
| GO:0042742                                                | Defense response to bacterium                                        | 6               |
| GO:0009617                                                | Response to bacterium                                                | 5               |
| GO:0009620                                                | Response to fungus                                                   | 5               |
| GO:0046847                                                | Filopodium assembly                                                  | 5               |
| GO:0098542                                                | Defense response to other organism                                   | 5               |
| GO:0051707                                                | Response to other organism                                           | 4               |

**S5 Table:** The categorized biological processes based on the AD-related pathways

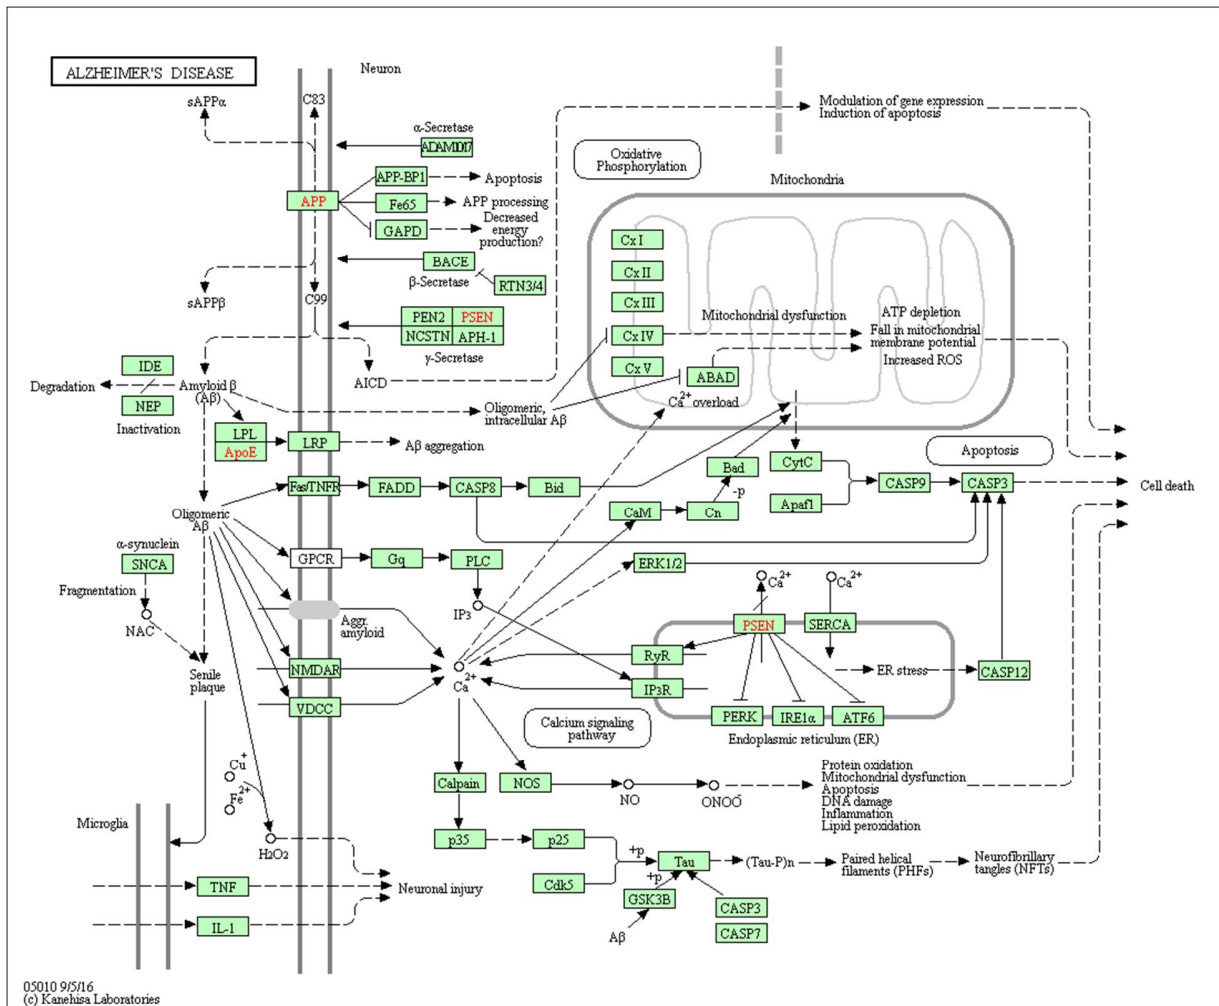

Based on the KEGG database [4], oxidative stress, calcium signaling pathway, apoptosis, inflammation, microglia activation and migration, apolipoprotein E and phospholipid transport dysfunction, neurofibrillary tangle formation, DNA damage and protein oxidation are well-known Alzheimer's disease related pathways.

## References:

1. Liu C-C, Kanekiyo T, Xu H, Bu G (2013) Apolipoprotein E and Alzheimer disease: risk, mechanisms and therapy. *Nature Reviews Neurology* 9: 106-118.
2. Maler JM, Spitzer P, Lewczuk P, Kornhuber J, Herrmann M, et al. (2006) Decreased circulating CD34+ stem cells in early Alzheimer's disease: Evidence for a deficient hematopoietic brain support? *Mol Psychiatry* 11: 1113-1115.

**S5 Table:** The categorized biological processes based on the AD-related pathways

3. Ray S, Britschgi M, Herbert C, Takeda-Uchimura Y, Boxer A, et al. (2007) Classification and prediction of clinical Alzheimer's diagnosis based on plasma signaling proteins. *Nature medicine* 13: 1359-1362.
4. Kanehisa M, Furumichi M, Tanabe M, Sato Y, Morishima K (2017) KEGG: new perspectives on genomes, pathways, diseases and drugs. *Nucleic Acids Res* 45: D353-D361.
