# Supplementary material for: Three-way interaction model to trace the mechanisms involved in Alzheimer’s disease transgenic mice
Source: PubMed Central journal article supplement (PMC5608283; doi:10.1371/journal.pone.0184697), 2017-09-21

S 2 Fig. The  $p$ -value histogram of the top 300000 three-way interactions.

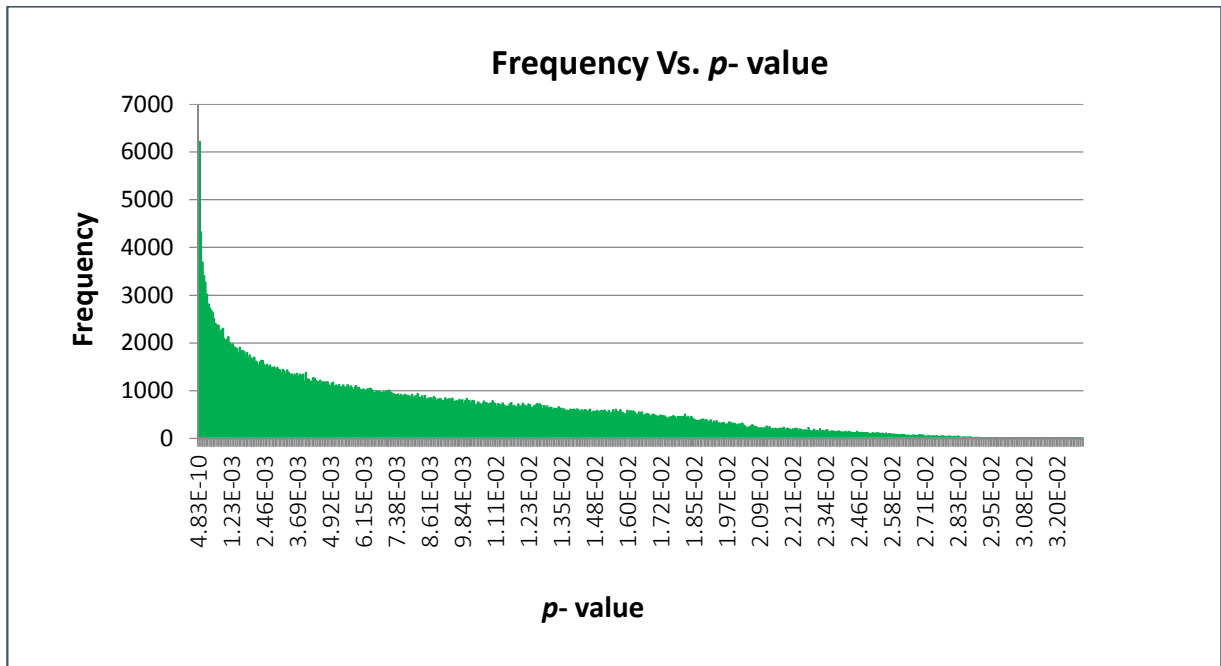

Supplement: pone.0184697.s007.pdf [file pone.0184697.s007.pdf]
