# Supplementary material for: Three-way interaction model to trace the mechanisms involved in Alzheimer’s disease transgenic mice
Source: PubMed Central journal article supplement (PMC5608283; doi:10.1371/journal.pone.0184697), 2017-09-21

**S3 Fig.** Statistically significant triplets Network. This network shows that Slc14a1, Dock8, Slc11a1 and Parvg with 10, 7, 7 and 6 connections respectively have most contribution in the statistically significant triplets rather than other  $X_3$ .

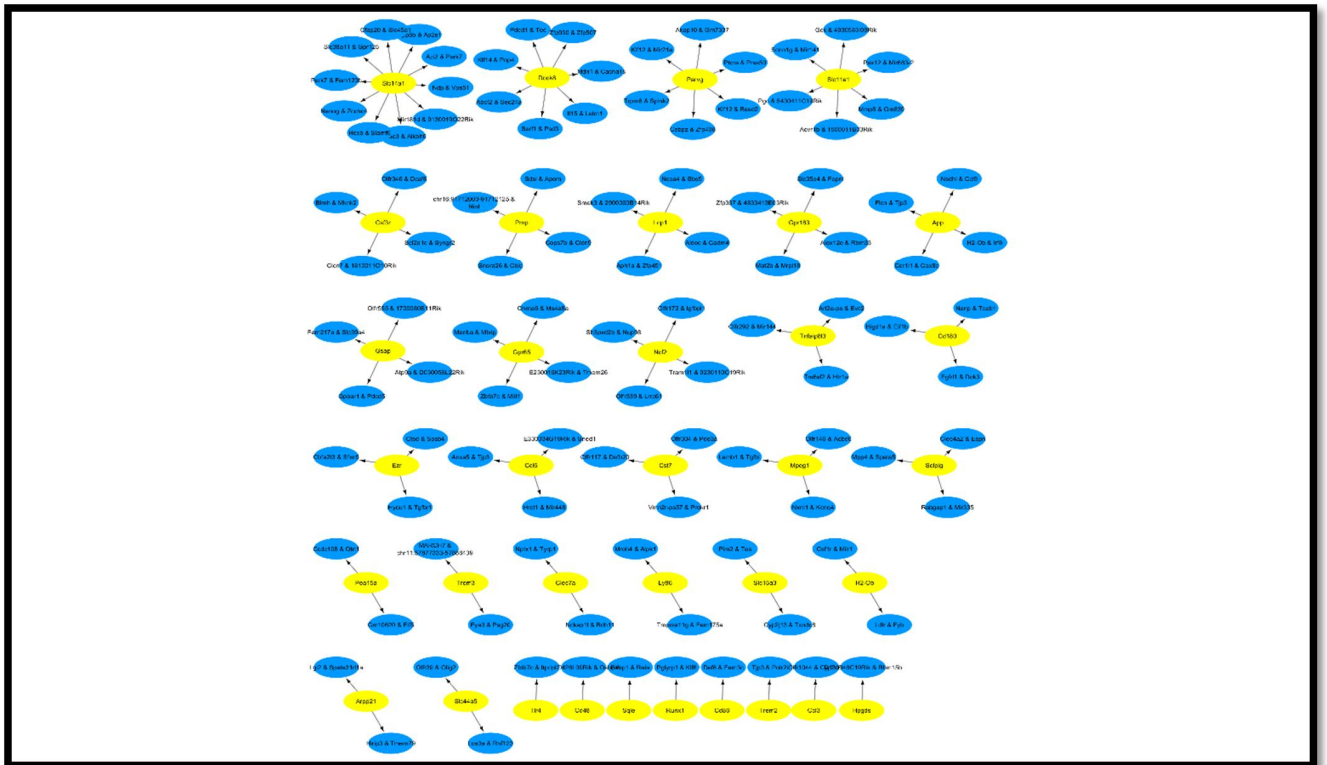

Supplement: pone.0184697.s008.pdf [file pone.0184697.s008.pdf]
