# Supplementary material for: Three-way interaction model to trace the mechanisms involved in Alzheimer’s disease transgenic mice
Source: PubMed Central journal article supplement (PMC5608283; doi:10.1371/journal.pone.0184697), 2017-09-21

**S4 Figs.** Scatter plots of 12 triplets in which  $X_1$  and  $X_2$  are involved in the same biological process.

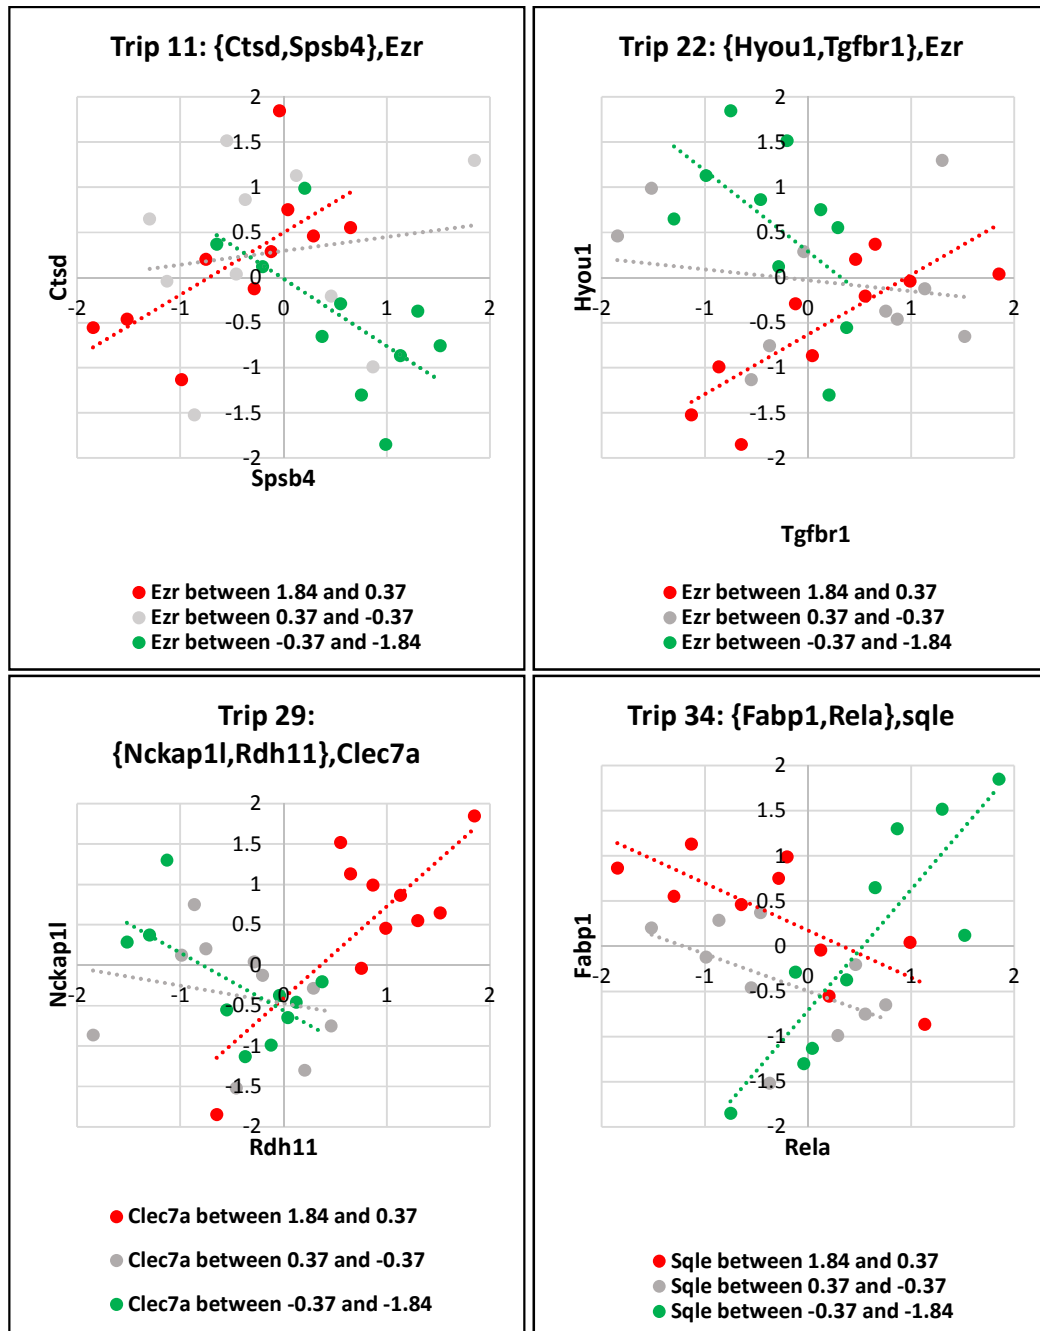

**S4 Figs.** Scatter plots of 12 triplets in which  $X_1$  and  $X_2$  are involved in the same biological process.

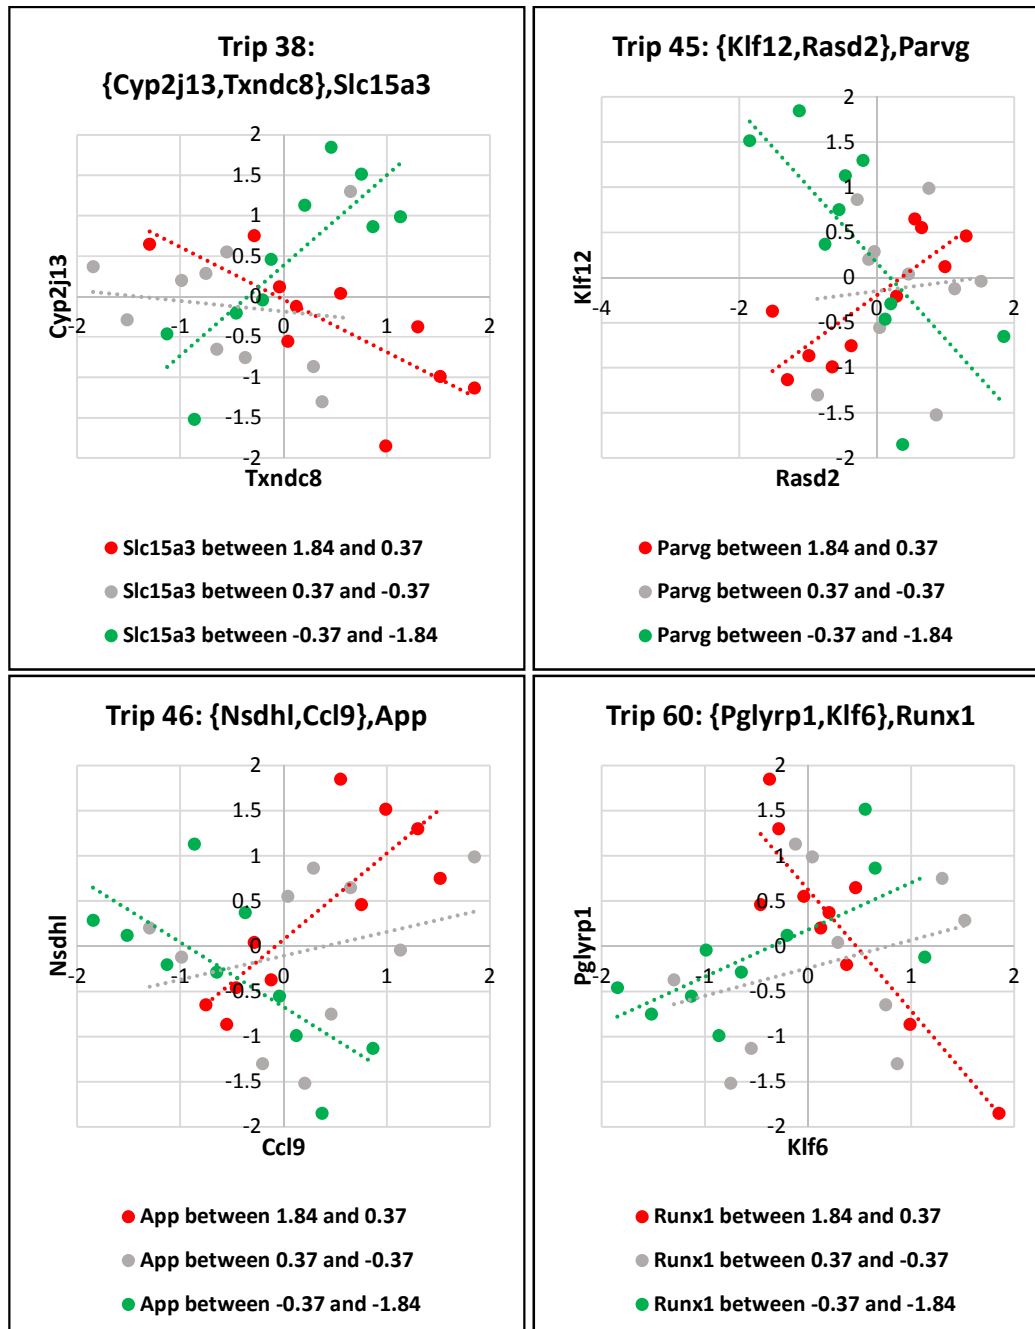

**S4 Figs.** Scatter plots of 12 triplets in which  $X_1$  and  $X_2$  are involved in the same biological process.

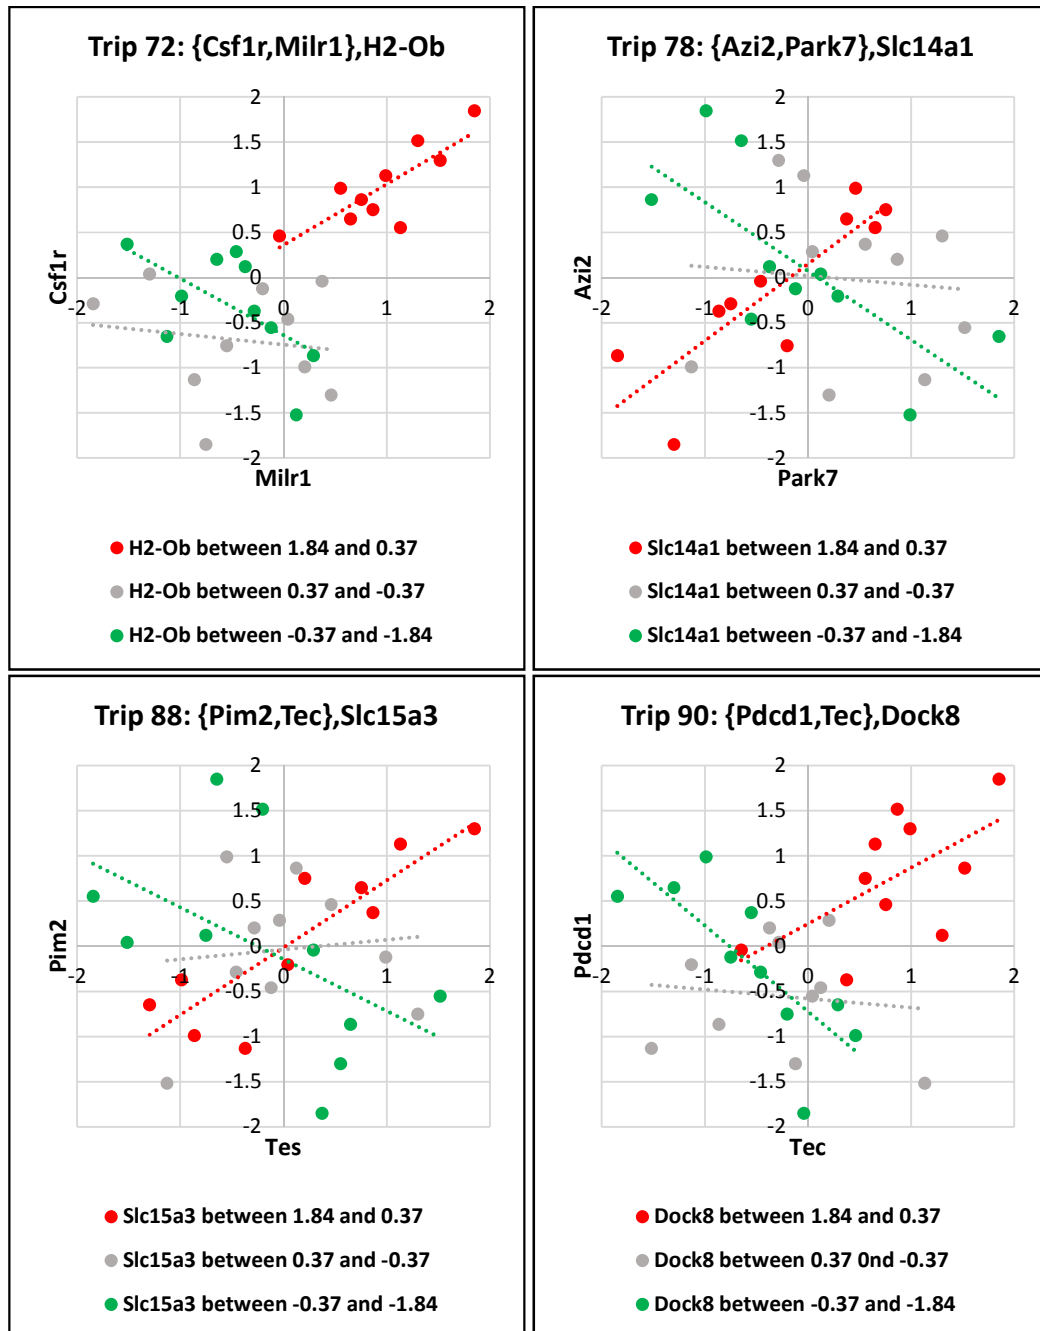

Supplement: pone.0184697.s009.pdf [file pone.0184697.s009.pdf]
