# Supplementary material for: Three-way interaction model to trace the mechanisms involved in Alzheimer’s disease transgenic mice
Source: PLoS One. 2017 Sep 21;12(9):e0184697. doi: 10.1371/journal.pone.0184697 (PMC5608283; doi:10.1371/journal.pone.0184697)
Supplement: S1 File — (PDF) [file pone.0184697.s011.pdf]

**S1 File-A.** Gene regulatory network of the involved genes in the 106 triplets by considering  $p$ -value  $< 0.0001$  as the threshold. In this figure, the regulatory relationships of significant triplets are shown in red.

**S1 File-B.** As follow, the steps of construction gene regulatory network and detection of significant triplets in this network are explained.

- 1-  $X_3$  regulate  $X_1$
- 2-  $X_3$  regulate  $X_2$
- 3-  $X_3$  regulate  $X_1$  and  $X_3$  regulate  $X_2$
